# Supplementary material for: Rosenbergiella meliponini D21B Isolated from Pollen Pots of the Australian Stingless Bee Tetragonula carbonaria
Source: MDPI journal article supplement (doi:10.3390/microorganisms11041005), 2023-04-12
Supplement: s1 [file s1]

# ***Rosenbergiella meliponini* D21B isolated from pollen pots of the Australian stingless bee *Tetragonula carbonaria***

Anthony J. Farlow<sup>1</sup>, Darshani B. Rupasinghe<sup>1</sup>, Khalid M. Naji<sup>1</sup>, Robert J. Capon<sup>2</sup>, and Dieter Spiteller<sup>1\*</sup>

## **Table of contents**

|                                                                                                                              |           |
|------------------------------------------------------------------------------------------------------------------------------|-----------|
| <b>Cultivation of <i>Rosenbergiella</i> strains</b>                                                                          | <b>3</b>  |
| <b>Gas chromatography-mass spectrometry (GC-MS)</b>                                                                          | <b>4</b>  |
| GC-MS program for the analysis of volatile organic compounds collected by SPME                                               | 4         |
| GC-MS program for ethyl acetate extracts of spent <i>Rosenbergiella</i> medium                                               | 4         |
| Analysis of fatty acid methyl esters from <i>Rosenbergiella</i> strains by GC-MS                                             | 4         |
| Fatty acid trimethylsilyl esters from lipid hydrolysates of <i>Rosenbergiella</i> isolates and <i>R. epipactidis</i> 2.1A    | 7         |
| Compounds identified by GC-MS in ethyl acetate extracts of spent medium of <i>R. meliponini</i> D21B                         | 8         |
| GC-MS analysis of volatile organic compounds released by the <i>Rosenbergiella</i> isolates and <i>R. epipactidis</i> 2.1A   | 9         |
| <b>Phylogenetic analysis of 16S rDNA and house-keeping genes of <i>Rosenbergiella</i> isolates from <i>T. carbonaria</i></b> | <b>12</b> |
| Detailed neighbour joining phylogenetic trees of <i>Rosenbergiella</i> strains                                               | 12        |
| ANI scores                                                                                                                   | 17        |
| <b>Characteristics of the draft genome of <i>R. meliponini</i> D21B</b>                                                      | <b>19</b> |
| <b>Secondary metabolite biosynthetic gene clusters from <i>R. meliponini</i> D21B</b>                                        | <b>23</b> |
| Amino acid biosynthesis by <i>Rosenbergiella</i> strains                                                                     | 28        |
| Production of vitamins by <i>Rosenbergiella</i> strains                                                                      | 28        |
| Vitamin B <sub>1</sub> (thiamine)                                                                                            | 30        |
| Vitamin B <sub>2</sub> (Riboflavin)                                                                                          | 32        |
| Vitamin B <sub>3</sub> (Niacin)                                                                                              | 33        |
| Vitamin B <sub>5</sub> (Pantothenic acid)                                                                                    | 35        |
| Vitamin B <sub>6</sub> (pyridoxine)                                                                                          | 36        |
| Vitamin B <sub>7</sub> (biotin)                                                                                              | 37        |
| Vitamin B <sub>9</sub> (folate)                                                                                              | 39        |
| Vitamin B <sub>10</sub> (4-aminobenzoic acid)                                                                                | 40        |
|                                                                                                                              | 1         |

|                                                              |           |
|--------------------------------------------------------------|-----------|
| Vitamin B <sub>12</sub> (cobalamin)                          | 41        |
| <b>Biosynthesis of 2-phenylethanol</b>                       | <b>44</b> |
| Amino acid deaminase (AAD) pathway                           | 44        |
| The Ehrlich pathway                                          | 44        |
| Aromatic amino acid decarboxylase (AADC) pathway             | 44        |
| <b>Resistance to environmental challenges</b>                | <b>49</b> |
| Antibiotic resistance                                        | 49        |
| Genes associated with virulence of <i>R. meliponini</i> D21B | 51        |
| Acid stress responses                                        | 53        |
| Osmotic stress                                               | 54        |
| Oxidative stress responses                                   | 57        |
| References                                                   | 60        |

## **Cultivation of *Rosenbergiella* strains**

Solid medium for agar plates was supplemented with 15 g/l agar (Kobe).

Double distilled water was used to prepare the media.

### **J broth [1]**

Yeast extract (15 g/l), casein tryptone (5 g/l),  $K_2HPO_4$  (3 g/l), glucose (2 g/l, autoclaved separately). pH was adjusted to 7.3-7.5 using 2 N HCl.

### **Lysogeny broth Luria (LB Luria) [2]**

Casein tryptone (10 g/l), yeast extract (5 g/l), sodium chloride (0.5 g/l).

### **No-Salt lysogeny broth (NSLB) [3]**

Casein tryptone (10 g/l), yeast extract (5 g/l).

### **Yeast extract sucrose (YES) broth [4]**

Sucrose (150 g/l), yeast extract (20 g/l),  $MgSO_4 \cdot 7H_2O$  (0.5 g/l),  $ZnSO_4 \cdot 7H_2O$  (10 mg/l),  $CuSO_4 \cdot 5H_2O$  (5 mg/l).

### ***Rosenbergiella* yeast-sucrose (RYS) broth**

Sucrose (50 g/l), yeast extract (24 g/l),  $MgSO_4 \cdot 7H_2O$  (0.5 g/l),  $ZnSO_4 \cdot 7H_2O$  (10 mg/l),  $CuSO_4 \cdot 5H_2O$  (5 mg/l).

This medium is based on the yeast extract sucrose medium described above, and was ideal for *Rosenbergiella* cultivation.

### **Minimal medium (MM) [5]**

1.07 g/l  $NH_4Cl$ , 61.6 mg/l  $MgSO_4 \cdot 7H_2O$ , 10 g/l glucose, 10 ml/l 100 x M9 trace element solution, 1 ml/l vitamin mix (four vitamin mix or seven vitamin mix).

### **M9 trace elements (100 x stock) [5]**

$Na_2EDTA \cdot 2H_2O$  (500 mg/l),  $FeCl_2 \cdot 4H_2O$  (143 mg/l),  $ZnCl_2$  (4.7 mg/l),  $MnCl_2 \cdot 4H_2O$  (3 mg/l),  $H_3BO_3$  (30 mg/l),  $CoCl_2 \cdot 6H_2O$  (20 mg/l),  $CuCl_2 \cdot 2H_2O$  (1 mg/l),  $NiCl_2 \cdot 6H_2O$  (2 mg/l),  $Na_2MoO_4 \cdot 2H_2O$  (3 mg/l),  $CaCl_2 \cdot 2H_2O$  (100 mg/l).

### **Seven vitamin mix (1000 x stock) [6]**

50 µg/l cyanocobalamin, 40 µg/l 4-aminobenzoic acid, 10 µg/l biotin, 100 µg/l nicotinic acid, 50 µg/l calcium pantothenate, 150 µg/l pyridoxamine dichloride, 100 µg/l thiamine dichloride.

**Four Vitamin mix (1000 x stock)**

100 µg/l thiamine dichloride, 50 µg/l cyanocobalamin, 100 µg/l nicotinic acid, 50 µg/l calcium pantothenate.

**Pollen agar**

20 g/l pollen (Bergland-Pharma GmbH & Co, Heimertingen, Germany), 1 g/l KH<sub>2</sub>PO<sub>4</sub>, 15g/l agar, adjusted to pH 5.5 with 2 N HCl.

**Gas chromatography-mass spectrometry (GC-MS)**

GC-MS was carried out using a Thermo Scientific Trace GC Ultra hyphenated to a Thermo Scientific ISQ mass spectrometer.

GC-MS conditions: GLC column: Macherey Nagel Optima 5MS 30 m x 0.25 mm, 0.25 µm, carrier gas: H<sub>2</sub>, inlet temperature: 280 °C, injection volume: 0.1-1 µl.

MS conditions: Electron impact ionization (EI, 70 eV), ion source temperature 220 °C, MS transfer line temperature: 290 °C.

**GC-MS program for the analysis of volatile organic compounds collected by SPME**

Initial column temperature: 50 °C for 3 min; 6 °C/min to 200 °C, 20 °C/min to 260 °C, 260 °C for 1 min. Carrier gas flow rate 0.8 ml/min, split ratio: splitless, solvent delay 5.5 min. Mass range 41-300 Da.

**GC-MS program for ethyl acetate extracts of spent *Rosenbergiella* medium**

Initial column temperature: 50 °C; 20 °C/min to 80 °C; 10 °C/min to 280 °C, 280 °C for 1 min. Carrier gas flow rate: 0.7 ml/min, split ratio: 1:12, solvent delay 5 min. Mass range 41-450 Da.

**Analysis of fatty acid methyl esters from *Rosenbergiella* strains by GC-MS**

Lauric acid methyl ester: Rt = 9.00 min. EI-MS (m/z, (%)): 43 (28), 55 (27), 74 (100), 87 (55), 143 (12), 171 (10), 183 (9), 214 (6).

Myristic acid methyl ester: Rt = 11.23 min. EI-MS (m/z, (%)): 43 (26), 55 (23), 74 (100), 87 (59), 143 (16), 199 (15), 211 (8), 242 (12).

Hexadecenoic acid methyl ester: Rt = 13.05 min. EI-MS (m/z, (%)): 43 (45), 55 (100), 69 (65), 96 (53), 152 (14), 194 (7), 236 (25), 268 (8).

Palmitic acid methyl ester: Rt = 13.28 min. EI-MS (m/z, (%)): 43 (28), 55 (22), 74 (100), 87 (65), 143 (14), 227 (11), 270 (15).

Saturated C17 cyclopropyl fatty acid methyl ester: Rt = 14.08 min. EI-MS (m/z, (%)): 55 (100), 69 (67), 74 (54), 83 (48), 96 (43), 111 (23), 166 (10), 208 (12), 250 (18), 282 (3).

Octadecenoic acid methyl ester: Rt = 14.96 min. EI-MS (m/z, (%)): 55 (100), 69 (67), 96 (44), 111 (22), 180 (10), 222 (14), 264 (25), 296 (5).

Stearic acid methyl ester: Rt = 15.14 min. EI-MS (m/z, (%)): 43 (39), 55 (31), 74 (100), 87 (63), 143 (16), 255 (11), 298 (20).

**Table S1:** Fatty acid methyl esters from lipid hydrolysates of *Rosenbergiella* isolates and *R. epipactidis* 2.1A. Numbers represent peak area percentage of the total integrated area. Only compounds with peak areas > 5 % are listed. Compounds were identified by comparisons to authenticated standards and/or NIST library comparisons of the fragmentation patterns.

| <b>R<sub>T</sub> (min)</b> | <b>Identity</b>         | <b><i>R. epipactidis</i> 2.1A</b> | <b><i>Rosenbergiella</i> sp. D8K</b> | <b><i>Rosenbergiella</i> sp. D15G</b> | <b><i>R. meliponini</i> D21B</b> |
|----------------------------|-------------------------|-----------------------------------|--------------------------------------|---------------------------------------|----------------------------------|
| 9.00                       | Lauric acid             | Trace                             | Trace                                | Trace                                 | Trace                            |
| 11.23                      | Myristic acid           | 6                                 | 13                                   | 11                                    | 6                                |
| 13.05                      | Palmitoleic acid        | Trace                             | Trace                                | Trace                                 | Trace                            |
| 13.28                      | Palmitic acid           | 64                                | 68                                   | 64                                    | 64                               |
| 14.08                      | C <sub>17:0</sub> cyclo | 12                                | 5                                    | 20                                    | 12                               |
| 14.96                      | Octadecenoic acid       | 9                                 | Trace                                | Trace                                 | 8                                |
| 15.14                      | Stearic acid            | 6                                 | Trace                                | Trace                                 | 6                                |

**Fatty acid trimethylsilyl esters from lipid hydrolysates of *Rosenbergiella* isolates and *R. epipactidis* 2.1A**

All *Rosenbergiella* strains examined here exhibited the following five main peaks.

Lauric acid trimethylsilyl ester: Rt = 10.52 min. EI-MS (m/z, (%)): 73 (90), 75 (71), 117 (100), 129 (36), 132 (46), 145 (18), 257 (89), 272 (6).

Myristic acid trimethylsilyl ester: Rt = 12.58 min. EI-MS (m/z, (%)): 73 (83), 75 (66), 117 (100), 129 (36), 132 (47), 145 (21), 285 (83), 300 (8).

3-(Trimethylsiloxy)myristic acid trimethylsilyl ester: Rt = 14.40 min. EI-MS (m/z, (%)): 73 (100), 75 (43), 147 (58), 233 (68), 257 (29), 373 (20).

Palmitic acid trimethylsilyl ester: Rt = 14.47 min. EI-MS (m/z, (%)): 73 (82), 75 (59), 117 (100), 129 (41), 132 (54), 145 (24), 313 (65), 328 (9).

C17 Cyclopropyl fatty acid trimethylsilyl ester: Rt = 15.22 min. EI-MS (m/z, (%)): 55 (78), 73 (87), 75 (100), 117 (79), 129 (51), 145 (29), 325 (31).

**Table S2:** Fatty acid TMS esters from lipid hydrolysates of *Rosenbergiella* isolates and *R. epipactidis* 2.1A. Numbers represent peak area percentage total integrated area. Only compounds with peak areas > 5% are listed. Compounds were identified by comparisons to known standards and/or NIST library comparison of fragmentation patterns.

| <b>R<sub>T</sub></b><br><b>(min)</b> | <b>Identity</b>         | <b><i>R.</i></b><br><b><i>epipactidis</i></b><br><b>2.1A</b> | <b><i>Rosenbergiella</i></b><br><b>sp. D08K</b> | <b><i>Rosenbergiella</i></b><br><b>sp. D15G</b> | <b><i>R.</i></b><br><b><i>meliponini</i></b><br><b>D21B</b> |
|--------------------------------------|-------------------------|--------------------------------------------------------------|-------------------------------------------------|-------------------------------------------------|-------------------------------------------------------------|
| 10.52                                | Lauric acid             | 12                                                           | 26                                              | 14                                              | 14                                                          |
| 12.58                                | Myristic acid           | 12                                                           | 21                                              | 17                                              | 18                                                          |
| 14.40                                | C <sub>14:0-3-OH</sub>  | 41                                                           | 28                                              | 29                                              | 35                                                          |
| 14.47                                | Palmitic acid           | 25                                                           | 18                                              | 28                                              | 24                                                          |
| 15.21                                | C <sub>17:0</sub> cyclo | 10                                                           | 8                                               | 12                                              | 9                                                           |

**Compounds identified by GC-MS in ethyl acetate extracts of spent medium of *R. meliponini* D21B**

2-Phenylethanol trimethylsilyl ether: Rt = 5.46 min. EI-MS (m/z, (%)): 73 (100), 75 (37), 91 (31), 103 (88), 161 (12), 179 (72), 180 (12).

2-Phenylacetic acid trimethylsilyl ester: Rt = 6.31 min. EI-MS (m/z, (%)): 65 (7), 73 (100), 75 (34), 91 (17), 164 (22), 193 (12), 194 (2).

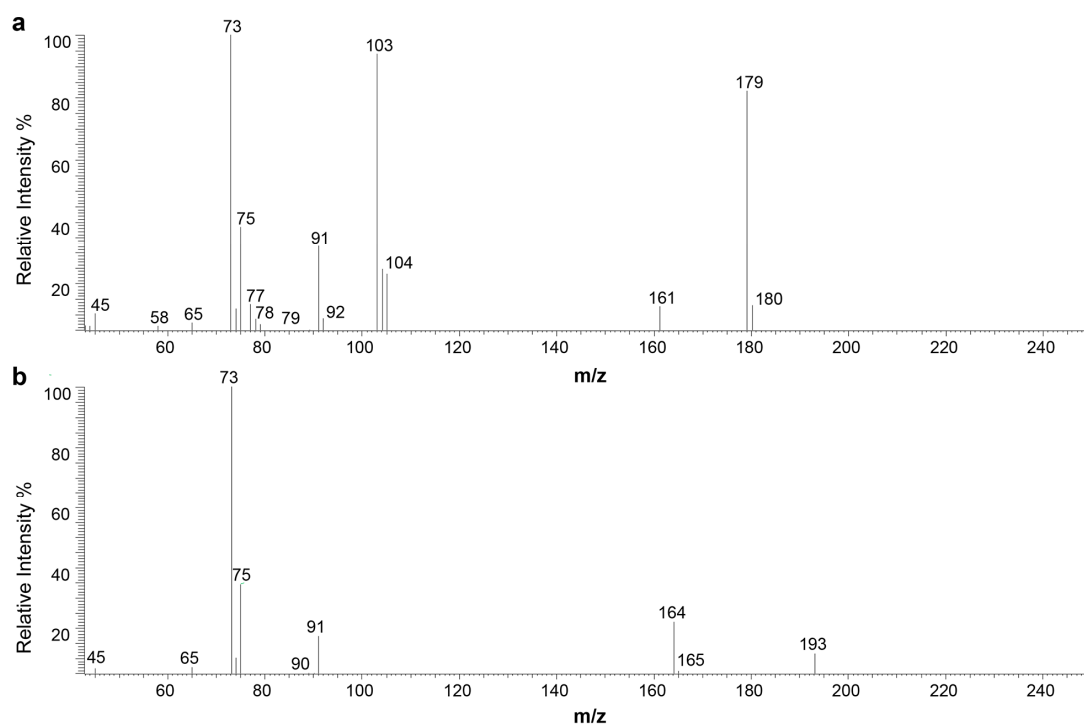

**Figure S1:** EI-MS spectra of the major compounds in the spent medium of *R. meliponini* 2.1A, (a) 2-phenylethanol, (b) 2-phenylacetic acid



**GC-MS analysis of volatile organic compounds released by the *Rosenbergiella* isolates and *R. epipactidis* 2.1A**

2-Phenylethanol, Rt = 9.60 min. EI-MS (m/z, (%)): 65 (17), 77 (5), 78 (6), 91 (100), 92 (61), 104 (7), 122 (31).

2-Phenylethanol acetate, Rt = 13.02 min. EI-MS (m/z, (%)): 43 (37), 65 (5), 78 (8), 91 (14), 104 (100), 105 (11).

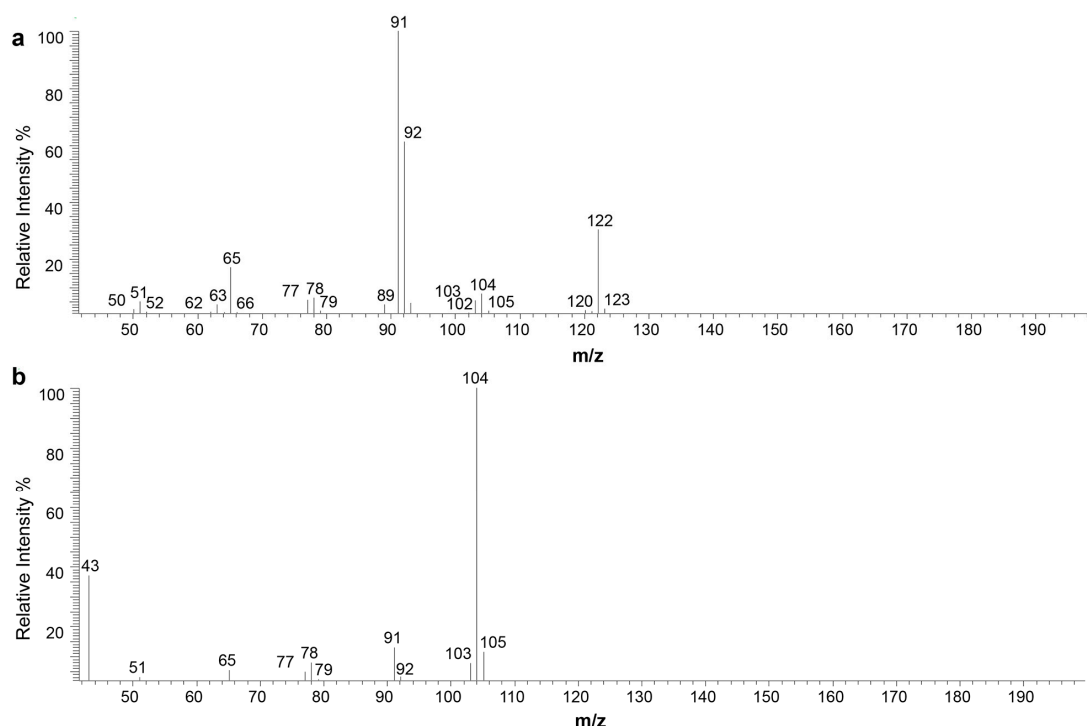

**Figure S2:** EI-MS spectra of (a) 2-phenylethanol and (b) 2-phenylethyl acetate

**Quantification of 2-phenylethanol and 2-phenylacetic acid**

A standard curve of 2-phenylethanol and 2-phenylacetic acid (each at 10 mg/ml in acetone) was prepared, using benzoic acid (0.86 mg/ml in acetone) as an internal standard. Varying quantities (1-10  $\mu$ l) of 2-phenylethanol/2-phenylacetic acid solution were combined with benzoic acid standard solution (50  $\mu$ l) and the solvent was evaporated at 60 °C on a heat block. MSTFA (10  $\mu$ l) was added, the vial was capped, and the mixture heated at 60 °C for 1 h. Diethyl ether (ca. 100  $\mu$ l) was added and the mixture was analysed by GC-MS.

*R. meliponini* D21B and *R. epipactidis* 2.1A were each grown for 6 d in RYS broth (100 ml, 28 °C, 150 rpm). Cells were pelleted by centrifugation (RCF 4162, 20 min).

The supernatant was acidified with 2N HCl (pH 1-2) and extracted with diethyl ether (3 x 20 ml). The extracts were dried and the solvent was reduced to approx. 20 ml by rotary evaporation and subsequently made up accurately to 40 ml. Aliquots of these extracts were combined with the aforementioned benzoic acid standard solution (50  $\mu$ l), derivatized with MSTFA as described above, and analyzed by GC-MS.

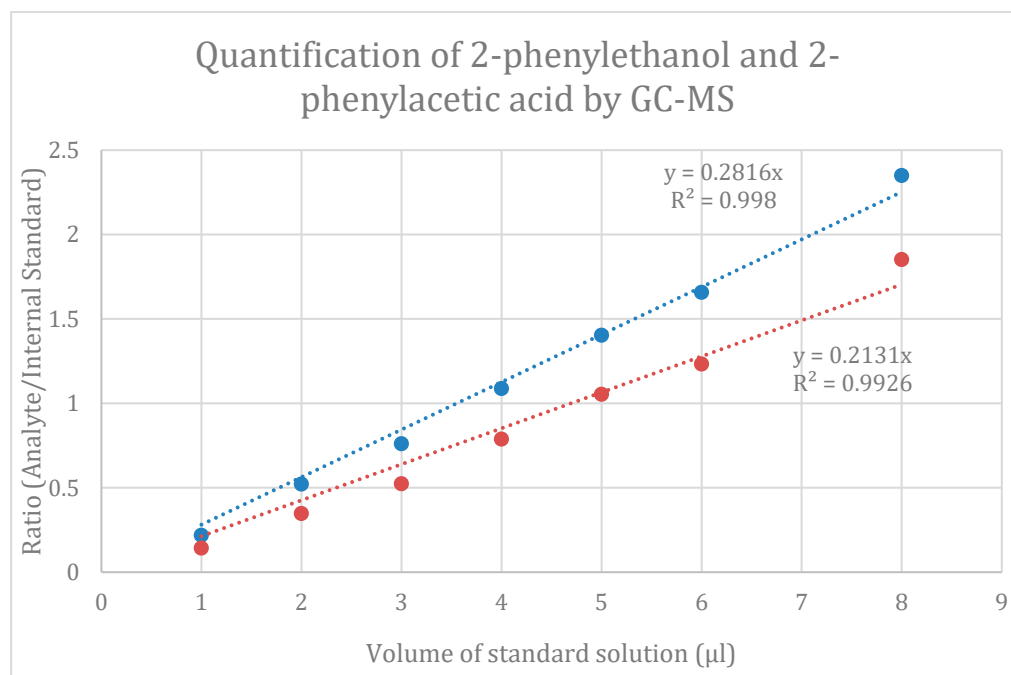

**Figure S3:** Standard curve of 2-phenylethanol (blue) and 2-phenylacetic acid (red) by GC-MS (internal standard: benzoic acid)

**Table S3:** Quantification of 2-phenylethanol and phenylacetic acid in spent medium extracts of *R. epipactidis* 2.1A and *R. meliponini* D21B by GC-MS. Average TIC (total ion count) peak area ratios of the analytes are divided by the internal standard (benzoic acid). The averages and standard deviations of four replicates are shown.

| Extract                    | Volume (µl) | 2-Phenylethanol        |                                    | 2-Phenylacetic acid    |                                    |
|----------------------------|-------------|------------------------|------------------------------------|------------------------|------------------------------------|
|                            |             | Average TIC ratio (SD) | Concentration in spent medium (SD) | Average TIC ratio (SD) | Concentration in spent medium (SD) |
| <i>R. epipactidis</i> 2.1A | 80          | 0                      | 0                                  | 0.8198 (0.0819)        | 0.192 g/l (0.019)                  |
| <i>R. meliponini</i> D21B  | 100         | 1.2482 (0.0622)        | 0.177 g/l (0.009)                  | 0.1325 (0.0121)        | (Below range of standard curve)    |
|                            | 150         | 2.3215 (0.1577)        | (Above range of standard curve)    | 0.2312 (0.0082)        | 0.029 g/l (0.001)                  |

## **Phylogenetic analysis of 16S rDNA and house-keeping genes of *Rosenbergiella* isolates from *T. carbonaria***

### **Detailed neighbour joining phylogenetic trees of *Rosenbergiella* strains**

Just before the submission of our manuscript, two new *Rosenbergiella* species, *R. metrosideri* strain JB07) and *R. gaditana* strain S61, were reported [7]. To date, the housekeeping genes 16S, *rpoB*, *atpD* and *gyrB* have been published, but the full or draft genomes are not yet publicly available. The similarity in the sequences of some of the housekeeping genes between *R. meliponini* D21B and *R. metrosideri* JB07 in particular warrants further investigation (Figure A4-A7, Table S5). Nevertheless, their substantial biochemical differences (see Table S8) justify the classification of these two organisms as different species despite the similarities in their housekeeping genes.

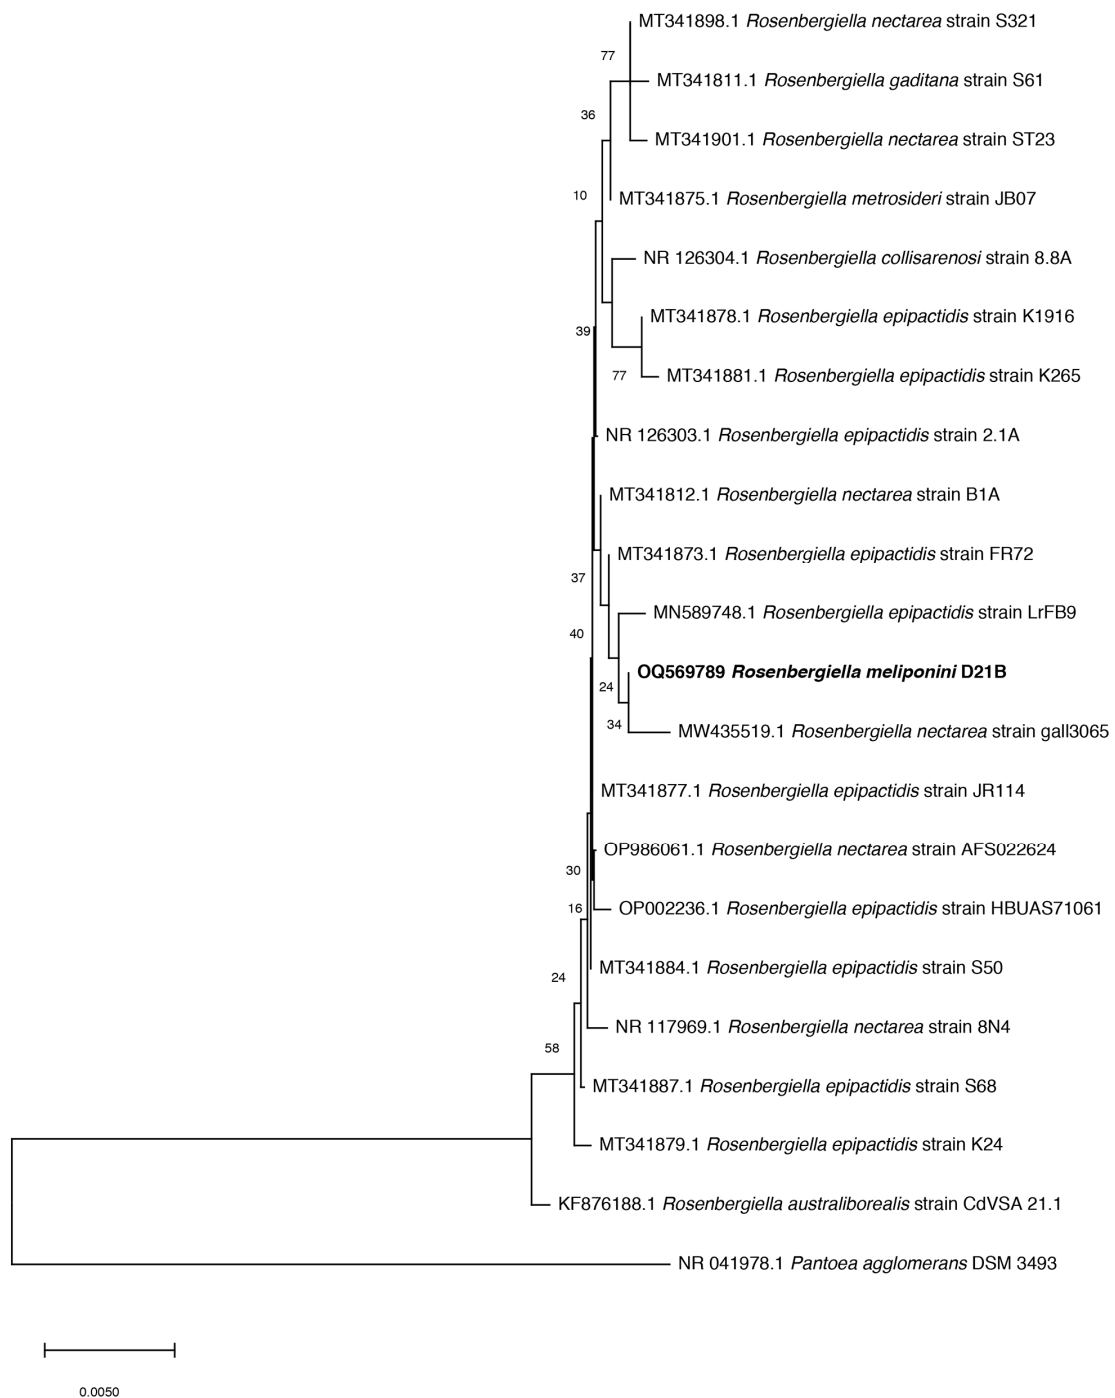

**Figure S4: Neighbor-joining phylogenetic tree based on 16S rRNA gene sequences (Clustal W alignment), including *R. metrosideri* strain JB07.** Bootstrap values calculated from 1000 replicates are indicated at branching nodes. Scale bar indicates 0.005 substitutions per nucleotide position.

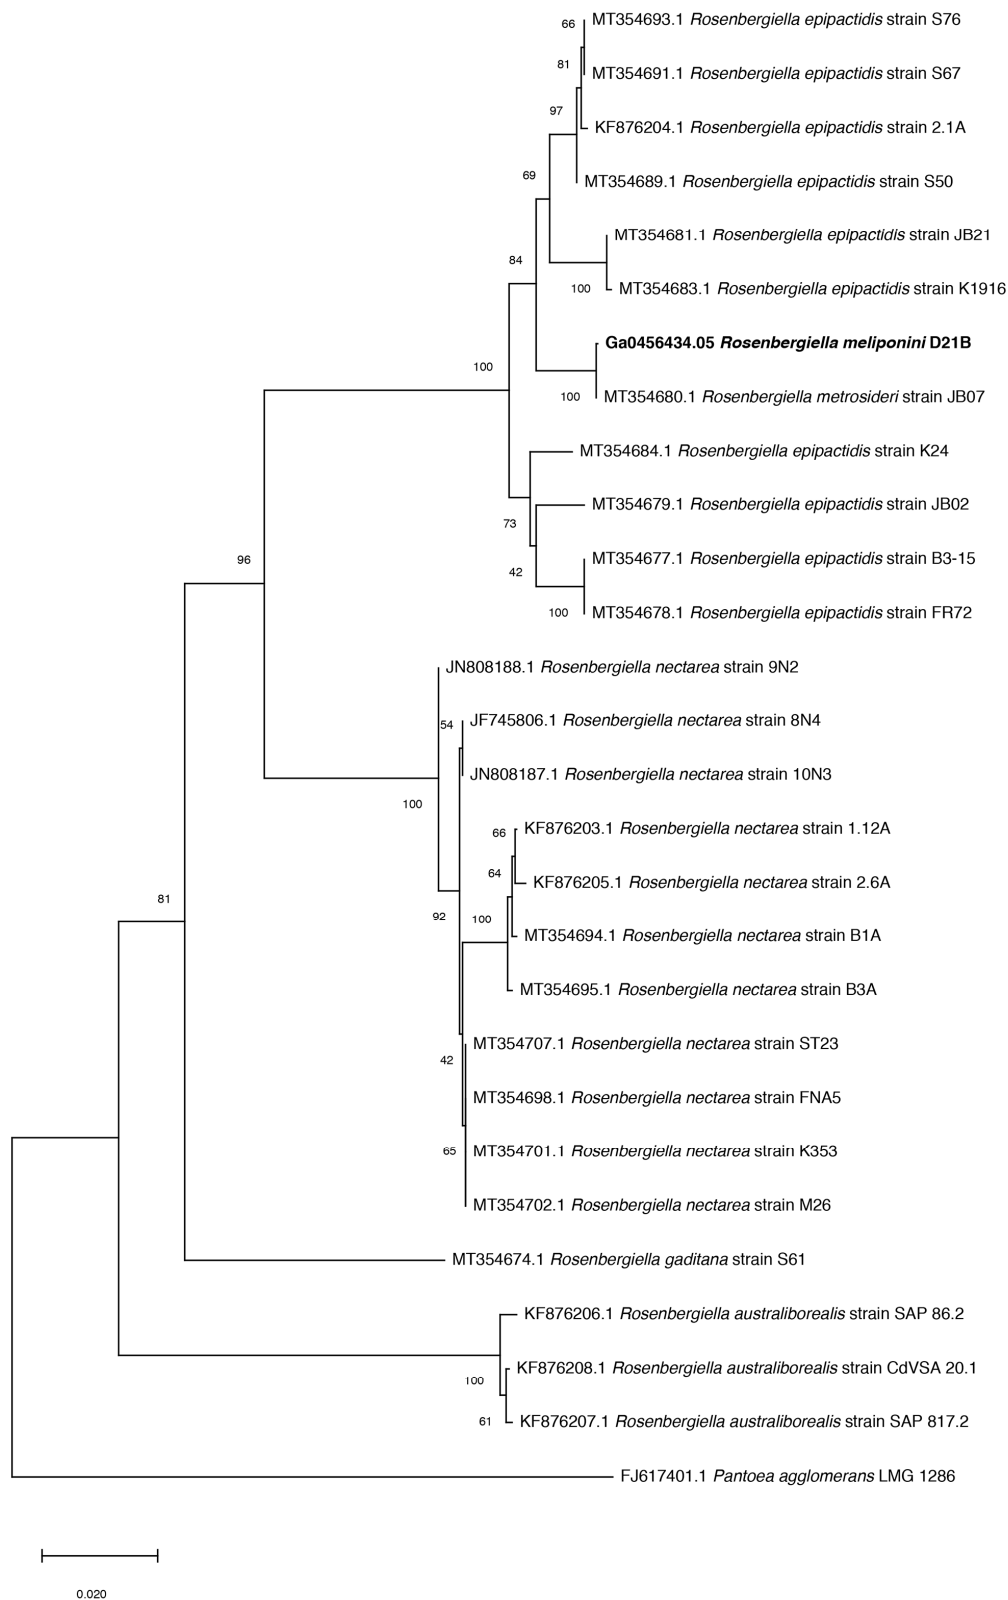

**Figure S5: Neighbor-joining phylogenetic tree based on *gyrB* sequences (Clustal W alignment), including the recently reported *R. metrosideri* strain JB07.** Bootstrap values calculated from 1000 replicates are indicated at branching nodes. Scale bar indicates 0.02 substitutions per nucleotide position.

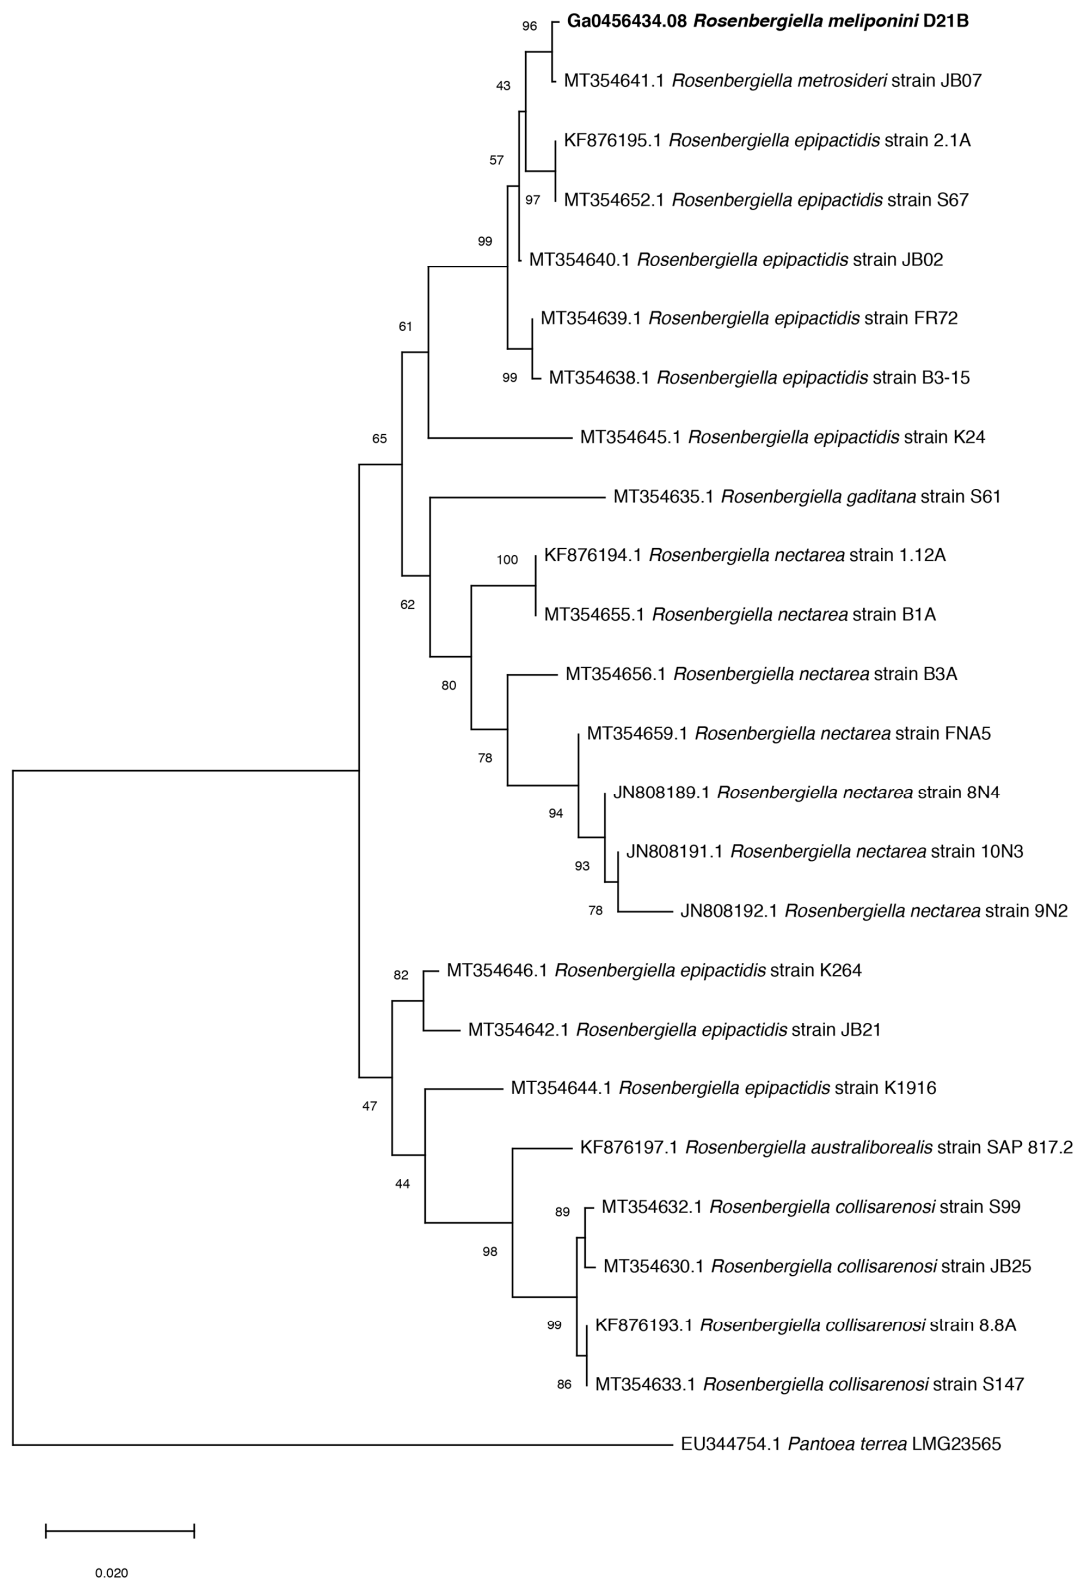

**Figure S6: Neighbor-joining phylogenetic tree based on *atpD* gene sequences (Clustal W alignment), including *R. metrosideri* strain JB07.** Bootstrap values calculated from 1000 replicates are indicated at branching nodes. Scale bar indicates 0.02 substitutions per nucleotide position.

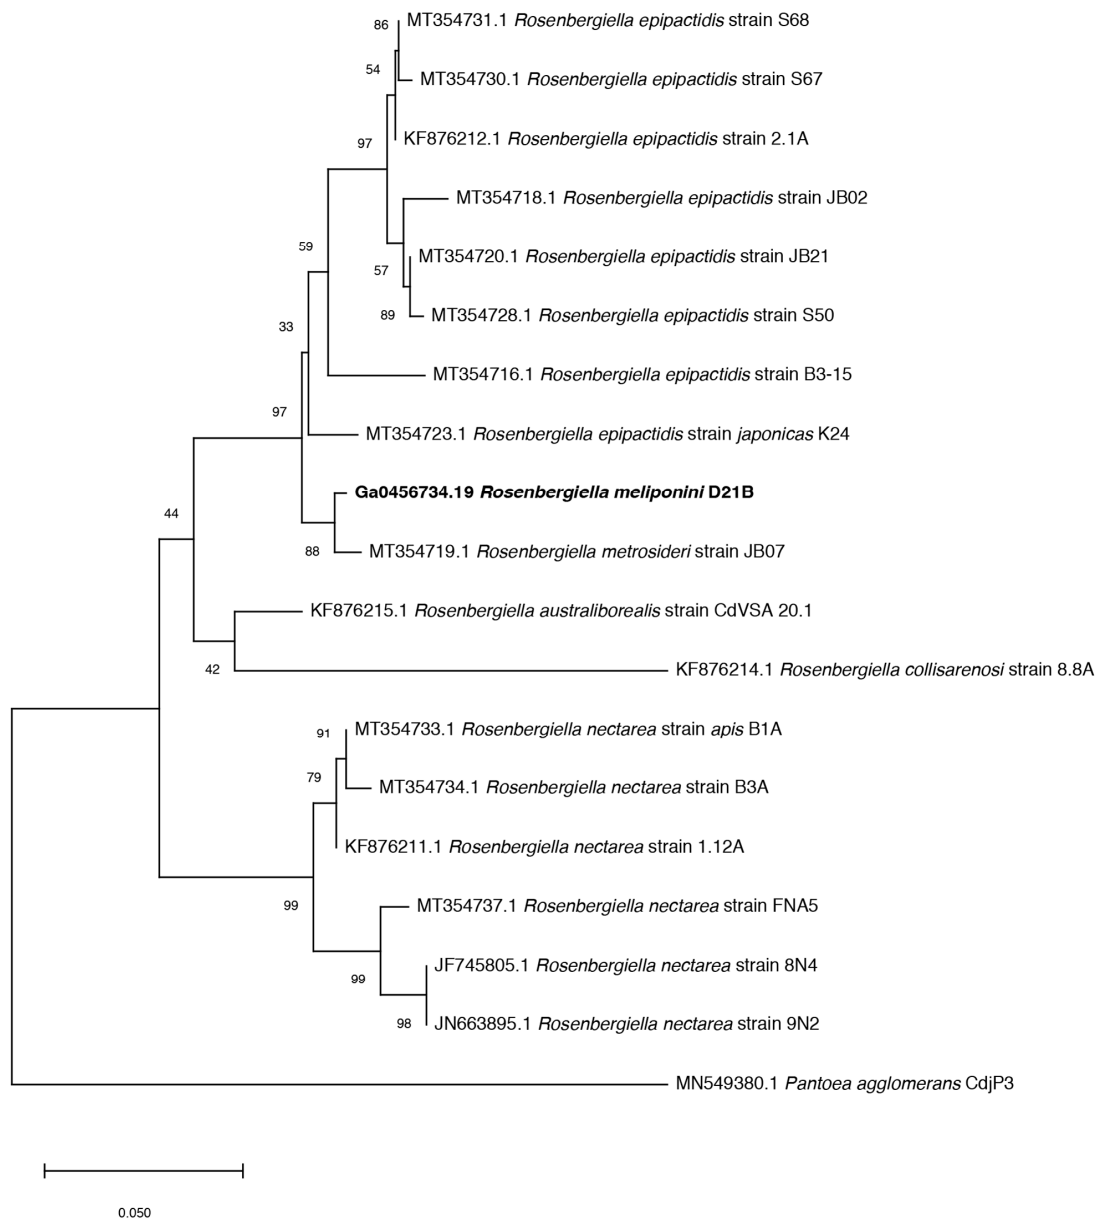

**Figure S7: Neighbor-joining phylogenetic tree based on *rpoB* gene sequences (Clustal W alignment), including *R. metrosideri* strain JB07.** Bootstrap values calculated from 1000 replicates are indicated at branching nodes. Scale bar indicates 0.05 substitutions per nucleotide position.



## ANI scores

**Table S4:** ANI scores [8] of *R. meliponini* D21B against sequenced *Rosenbergiella* strains, SD standard deviation.

| ANI score<br>of                        | <i>R. nectarea</i><br>8N4 | <i>R. epipactidis</i><br>2.1A | <i>R. australiborealis</i><br>CdVSA 20.1 | <i>R. collisarenosi</i><br>8.8A |
|----------------------------------------|---------------------------|-------------------------------|------------------------------------------|---------------------------------|
| <i>R. meliponini</i><br>D21B<br>versus | 85.82 (SD,<br>4.21 %)     | 94.84 (SD, 2.82<br>%)         | 94.84 (SD, 2.82 %)                       | 80.34 (SD, 5.77 %)              |

**Table S5:** Comparison of the phylogenetic analysis of *Rosenbergiella* isolates from *T. carbonaria* with other *Rosenbergiella* strains.

|                 | <b><i>Rosenbergiella</i> strain</b> | <i>R. meliponini</i><br>D21B | <i>R. epipactidis</i><br>2.1A | <i>R. nectarea</i><br>8N4 | <i>R. australiborealis</i><br>CdVSA20.1 | <i>R. collisarenosi</i><br>8.8A | <i>R. metrosideri</i><br>JB07 |
|-----------------|-------------------------------------|------------------------------|-------------------------------|---------------------------|-----------------------------------------|---------------------------------|-------------------------------|
| <b>16S rDNA</b> | <i>R. meliponini</i> D21B           |                              | 99.63 %                       | 99.46 %                   | 99.66 %                                 | 99.80 %                         | 99.85 %                       |
| <b>16S rDNA</b> | <i>Rosenbergiella</i> sp. D08K      | 99.78 %                      | 99.78 %                       | 99.40 %                   | 99.27 %                                 | 99.40 %                         | 99.85 %                       |
| <b>16S rDNA</b> | <i>Rosenbergiella</i> sp. D15G      | 99.77 %                      | 99.85 %                       | 99.47 %                   | 99.54 %                                 | 99.69 %                         | 99.85 %                       |
| <b>gyrB</b>     | <i>R. meliponini</i> D21B           |                              | 97.26 %                       | 87.43 %                   | 82.21 %                                 | 81.19 %                         | 100 %                         |
| <b>atpD</b>     | <i>R. meliponini</i> D21B           |                              | 99.19 %                       | 96.08 %                   | 94.87 %                                 | 94.20 %                         | 99.87 %                       |
| <b>ropB</b>     | <i>R. meliponini</i> D21B           |                              | 97.43 %                       | 90.30 %                   | 93.86 %                                 | 86.93 %                         | 99.07 %                       |

## Characteristics of the draft genome of *R. meliponini* D21B

**Table S6:** Distribution of clusters of orthologous genes in the draft genome of *R. meliponini* D21B (COGs)

| Name                                                          | Number of genes | Percentage of all identified genes |
|---------------------------------------------------------------|-----------------|------------------------------------|
| Amino acid transport and metabolism                           | 302             | 10.17 %                            |
| Carbohydrate transport and metabolism                         | 188             | 6.33 %                             |
| Cell cycle control, cell division, chromosome partitioning    | 43              | 1.45 %                             |
| Cell motility                                                 | 113             | 3.81 %                             |
| Cell wall/membrane/envelope biogenesis                        | 221             | 7.44 %                             |
| Coenzyme transport and metabolism                             | 158             | 5.32 %                             |
| Cytoskeleton                                                  | 1               | 0.03 %                             |
| Defence mechanisms                                            | 74              | 2.49 %                             |
| Energy production and conversion                              | 139             | 4.68 %                             |
| Extracellular structures                                      | 26              | 0.88 %                             |
| Function unknown                                              | 155             | 5.22 %                             |
| General function prediction only                              | 252             | 8.49 %                             |
| Inorganic ion transport and metabolism                        | 196             | 6.60 %                             |
| Intracellular trafficking, secretion, and vesicular transport | 84              | 2.83 %                             |
| Lipid transport and metabolism                                | 87              | 2.93 %                             |
| Mobilome: prophages, transposons                              | 24              | 0.81 %                             |
| Nucleotide transport and metabolism                           | 83              | 2.80 %                             |
| Posttranslational modification, protein turnover, chaperones  | 120             | 4.04 %                             |
| RNA processing and modification                               | 1               | 0.03 %                             |
| Replication, recombination and repair                         | 117             | 3.94 %                             |
| Secondary metabolites biosynthesis, transport and catabolism  | 58              | 1.95 %                             |
| Signal transduction mechanisms                                | 101             | 3.40 %                             |
| Transcription                                                 | 191             | 6.43 %                             |
| Translation, ribosomal structure and biogenesis               | 235             | 7.92 %                             |
| Genes not assigned into an abovementioned COG category        | 529             | 17.50 %                            |

**Table S7:** Minimum inhibitory concentrations of selected antibiotics against *Rosenbergiella* strains. *E. coli* Top10 serves as a reference antibiotic-sensitive *Enterobacterium*. Values are in µg/ml, (n = 3).

| Strain                         | Ampicillin | Kanamycin | Chloramphenicol | Novobiocin |
|--------------------------------|------------|-----------|-----------------|------------|
| <i>R. meliponini</i> D21B      | 300        | 17        | 20              | 67         |
| <i>Rosenbergiella</i> sp. D15G | 300        | 17        | 20              | 67         |
| <i>Rosenbergiella</i> sp. D08K | 100        | 6         | 20              | 22         |
| <i>R. epipactidis</i> 2.1A     | 300        | 6         | 20              | 67         |
| <i>E. coli</i> Top10           | 33         | 6         | 2               | 200        |
| Standard conc. [9-11]          | 100        | 50        | 20              | 200        |

**Table S8:** Morphological and biochemical characterization of *R. meliponini* D21B in comparison to the four reported *Rosenbergiella* type strains as well as the recently reported *R. metrosideri* JB07, including EnteroPluri biochemical results. Legend: + positive reaction, – negative reaction, w weak, n/a denotes data not available. Data for *R. meliponini* D21B, *Rosenbergiella* sp. D08K, *Rosenbergiella* sp. D15G and *R. epipactidis* 2.1A were derived experimentally. Data for *R. collisarenosi* 8.8A, *R. australiborealis* CdBSA20.1, *R. nectarea* 8N4 and *R. metrosideri* JB07 were obtained from the literature [7,12,13]. Substantial biochemical differences between *R. meliponini* D21B and the closest type strains according to housekeeping gene analysis, *R. epipactidis* 2.1A and *R. metrosideri* JB07, are shown in bold.

| Characteristic                     | <i>R. meliponini</i><br>D21B | <i>Rosenbergiella</i><br>sp. D08K | <i>Rosenbergiella</i><br>sp. D15G | <i>R. epipactidis</i><br>2.1A | <i>R. collisarenosi</i><br>8.8A | <i>R. australiborealis</i><br>CdBSA20.1 | <i>R. nectarea</i><br>8N4 | <i>R. metrosideri</i><br>JB07 |
|------------------------------------|------------------------------|-----------------------------------|-----------------------------------|-------------------------------|---------------------------------|-----------------------------------------|---------------------------|-------------------------------|
| Colony colour (on LB, J, RYS agar) | Yellow/orange                | Yellow/orange                     | Yellow/orange                     | Yellow/orange                 | Yellow/orange                   | Yellow/orange                           | Yellow/orange             | Pale yellow                   |
| Gram stain                         | –                            | –                                 | –                                 | –                             | –                               | –                                       | –                         | –                             |
| Cell morphology                    | Rods                         | Rods                              | Rods                              | Rods                          | Rods                            | Rods                                    | Rods                      | Rods                          |
| Motility                           | Motile                       | Motile                            | Motile                            | Motile                        | Motile                          | Motile                                  | Motile                    | Motile                        |
| Oxidase activity                   | –                            | –                                 | –                                 | –                             | –                               | –                                       | –                         | –                             |
| Catalase activity                  | +                            | +                                 | +                                 | +                             | +                               | +                                       | +                         | +                             |
| Anaerobic growth                   | Facultative                  | Facultative                       | Facultative                       | Facultative                   | Facultative                     | Facultative                             | Facultative               | Facultative                   |
| Sucrose tolerance                  | 0-50 %                       | 0-50 %                            | 0-50 %                            | 0-50 %                        | 0-50 %                          | 0-50 %                                  | 0-50 %                    | 0-50 %                        |
| Growth at 4 °C                     | –                            | –                                 | –                                 | –                             | –                               | Not reported                            | –                         | w                             |
| Growth at 28 °C                    | +                            | +                                 | +                                 | +                             | n/a                             | n/a                                     | n/a                       | +                             |

| Characteristic                 | <i>R. meliponini</i><br>D21B | <i>Rosenbergiella</i><br>sp. D08K | <i>Rosenbergiella</i><br>sp. D15G | <i>R. epipactidis</i><br>2.1A | <i>R. collisarenosi</i><br>8.8A | <i>R. australiborealis</i><br>CdBSA20.1 | <i>R. nectarea</i><br>8N4 | <i>R. metrosideri</i><br>JB07 |
|--------------------------------|------------------------------|-----------------------------------|-----------------------------------|-------------------------------|---------------------------------|-----------------------------------------|---------------------------|-------------------------------|
| Growth at 37 °C                | Poor                         | Poor                              | Poor                              | –                             | –                               | +                                       | +                         | +                             |
| Glucose/gas                    | +/-                          | +/-                               | +/-                               | +/-                           | +                               | +                                       | +                         | +, n/a                        |
| Lysine decarboxylase           | –                            | –                                 | –                                 | –                             | n/a                             | n/a                                     | –                         | +                             |
| Ornithine decarboxylase        | –                            | –                                 | –                                 | –                             | n/a                             | n/a                                     | –                         | –                             |
| Production of H <sub>2</sub> S | –                            | –                                 | –                                 | –                             | –                               | –                                       | –                         | –                             |
| Indole                         | –                            | –                                 | –                                 | –                             | –                               | –                                       | –                         | –                             |
| Adonitol                       | –                            | –                                 | –                                 | –                             | –                               | –                                       | –                         | –                             |
| Lactose                        | –                            | –                                 | –                                 | –                             | –                               | –                                       | –                         | –                             |
| Arabinose                      | +                            | +                                 | +                                 | +                             | +                               | +                                       | +                         | –                             |
| Sorbitol                       | –                            | –                                 | –                                 | –                             | –                               | –                                       | –                         | –                             |
| Acetoin                        | +                            | +                                 | +                                 | +                             | +                               | +                                       | +                         | –                             |
| Dulcitol                       | –                            | –                                 | –                                 | –                             | –                               | –                                       | –                         | n/a                           |
| Phenylalanine                  | –                            | –                                 | –                                 | –                             | n/a                             | n/a                                     | n/a                       | n/a                           |
| Urease                         | W                            | +                                 | w                                 | –                             | n/a                             | n/a                                     | –                         | –                             |
| Citrate                        | +                            | +                                 | +                                 | –                             | –                               | –                                       | –                         | –                             |

## Secondary metabolite biosynthetic gene clusters from *R. meliponini* D21B

AntiSMASH analysis [14,15] revealed five secondary metabolite gene clusters in *R. meliponini* D21B (see Figure A8 and Table S9).

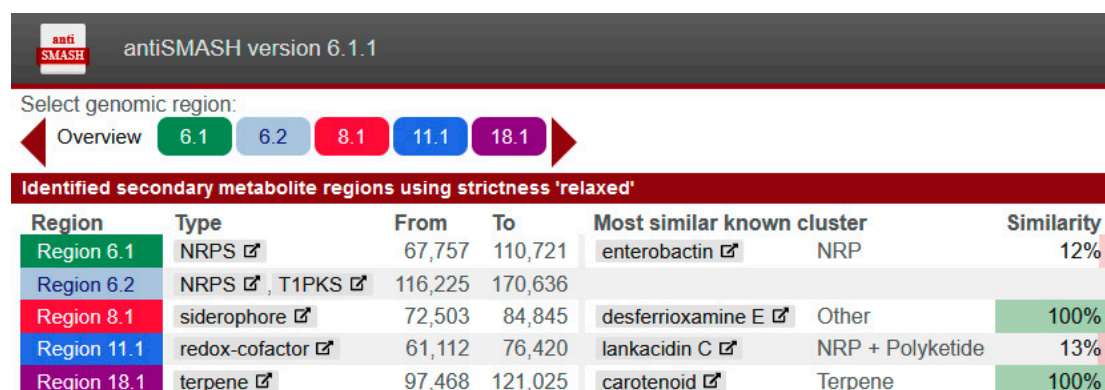

| Region      | Type           | From    | To      | Most similar known cluster | Similarity |
|-------------|----------------|---------|---------|----------------------------|------------|
| Region 6.1  | NRPS           | 67,757  | 110,721 | enterobactin               | 12%        |
| Region 6.2  | NRPS, T1PKS    | 116,225 | 170,636 |                            |            |
| Region 8.1  | siderophore    | 72,503  | 84,845  | desferrioxamine E          | 100%       |
| Region 11.1 | redox-cofactor | 61,112  | 76,420  | lankacidin C               | 13%        |
| Region 18.1 | terpene        | 97,468  | 121,025 | carotenoid                 | 100%       |

**Figure S8:** Summary of secondary metabolite biosynthetic gene clusters of *R. meliponini* D21B detected by antiSMASH [14,15].

Cluster 8.1 is predicted to encode for the production of the siderophore desferrioxamine (Figure A2) with 100 % similarity [16].

The biosynthetic gene cluster 6.1 is highly conserved across the *Rosenbergiella* genus, and shares low similarity to the biosynthetic gene clusters for the production of enterobactin like siderophores (Figure A4). It contains 10 out of 12 genes that are responsible for enterobactin synthesis in *E. coli* K12 [17]. However, both *R. meliponini* D21B and *R. nectarea* 8N4 lack genes similar to the lipopolysaccharide (LPS) O-antigen chain length determinant protein (FepE), and a gene that encodes an enterobactin exporter of the ENTs family (EntS).

Cluster 6.2 is predicted to code for a polyketide synthase non-ribosomal peptide synthetase biosynthetic gene cluster that is unique to *Rosenbergiella* D21B and may produce an unknown secondary metabolite.

Cluster 8.1 encodes genes necessary for the production of desferrioxamine, and this cluster is conserved across all *Rosenbergiella* genomes currently available.

Cluster 11.1 encodes for a putative redox cofactor of unknown function that appears to be conserved among the *Rosenbergiella* strains.

Cluster 18.1 is predicted to code for the production of carotenes with 100 % similarity (see chapter vitamins).

**Table S9:** Secondary metabolite producing gene cluster positions predicted by AntiSMASH [14,15]

| <b>Gene clusters<br/>predicted in <i>R.<br/>meliponini</i> D21B1</b> | <b><i>R.<br/>epipactidis</i><br/>JB21</b> | <b><i>R.<br/>epipactidis</i><br/>S68</b> | <b><i>R.<br/>epipactidis</i><br/>JB02</b> | <b><i>R. epipactidis</i><br/>GCF02260</b> | <b><i>R. nectarea</i><br/>GCF9001</b> |
|----------------------------------------------------------------------|-------------------------------------------|------------------------------------------|-------------------------------------------|-------------------------------------------|---------------------------------------|
| 6.1 (enterobactin)                                                   | 29.2                                      | 30.1                                     | 45.1                                      | 31.1                                      | 19.1                                  |
| 6.2 (NRPS/TIPKS)                                                     | -                                         | -                                        | -                                         | -                                         | -                                     |
| 8.1 (desferrioxamine)                                                | 32.1                                      | 2.1                                      | 4.1                                       | 37.1                                      | 9.1                                   |
| 11.1 (redox cofactor of<br>unknown function)                         | 4.1                                       | 29.1                                     | 10.1                                      | 14.1                                      | 18.1                                  |
| 18.1 (terpene<br>/carotenoid)                                        | 6.1                                       | 32.1                                     | 16.1                                      | 6.1                                       | 16.1                                  |

It should be noted that for all gene sequence comparisons except for the four housekeeping genes that were examined for the purpose of establishing the phylogenetic placement of the novel bacteria species, the putative peptide sequence identity was used for comparative purposes. Due to the degenerate nature of the genetic code, percentage peptide sequence identity was thought to provide a more meaningful comparison of gene conservation between species of bacteria.



**Table S10:** Conservation of desferrioxamine producing genes in *R. meliponini* D21B and the four reported *Rosenbergiella* species. Genes which are different in *R. meliponini* D21B to the other sequenced *Rosenbergiella* strains are highlighted in bold. The percentage of sequence identities is calculated for the putative protein sequence. Comparisons below have been made against characterized *dfo* genes from *Erwinia amylovora* (strain CFBP1430) [18,19]. Y indicates the presence of the gene.

| Characterized gene                                                    | Locus tags               | % Sequence identity | <i>R. meliponini</i> D21B | <i>R. nectarea</i> | <i>R. epipactidis</i> | <i>R. australiborealis</i> | <i>R. collisarenosi</i> |
|-----------------------------------------------------------------------|--------------------------|---------------------|---------------------------|--------------------|-----------------------|----------------------------|-------------------------|
| <i>dfoJ</i> , pyridoxal-dependent decarboxylase                       | Ga0456434_08_74680_76209 | 65%                 | Y                         | Y                  | Y                     | Y                          | Y                       |
| <i>dfoA</i> , FAD-dependent amine monooxygenase                       | Ga0456434_08_76209_77510 | 64%                 | Y                         | Y                  | Y                     | Y                          | Y                       |
| <i>dfoC</i> ( <i>desC</i> , <i>desD</i> ), desferrioxamine synthetase | Ga0456434_08_77503_79845 | 58%                 | Y                         | Y                  | Y                     | Y                          | Y                       |
| <i>FoxR</i> , siderophore uptake transmembrane transporter            | Ga0456434_08_81185_83302 | 72%                 | Y                         | Y                  | Y                     | Y                          | Y                       |

In addition to the prediction by antiSMASH the genome of *R. meliponini* D21B was screened for the presence of pyocin and colicin genes because these genes have been identified in other *Rosenbergiella* strains. Only the colicin V production gene *cvpA* was found in the *R. meliponini* D21B draft genome.

**Table S11:** Conservation of possible pyocin and colicin encoding genes in *Rosenbergiella* strains. Y indicates the presence of the gene, N indicates its absence

|         | Characterized gene                                                                                 | Locus tags                 | % Sequence identity | <i>R. meliponini</i> D21B | <i>R. nectarea</i> | <i>R. epipactidis</i> | <i>R. australiborealis</i> | <i>R. collisarenosi</i> |
|---------|----------------------------------------------------------------------------------------------------|----------------------------|---------------------|---------------------------|--------------------|-----------------------|----------------------------|-------------------------|
| Pyocin  | S-type pyocin domain-containing protein coding gene (X5) (from <i>R. nectarea</i> 8N4)             |                            |                     | N                         | Y                  | N                     | N                          | N                       |
| Colicin | Colicin uptake gene <i>tolR</i>                                                                    |                            |                     | N                         | Y                  | Y                     | Y                          | Y                       |
|         | colicin V production gene <i>cvpA</i> (of <i>Rosenbergiella epipactidis</i> 2.1A) (WP_048912330.1) | Ga0456434_01_235077_235562 | n/a                 | Y                         | N                  | Y                     | Y                          | Y                       |
|         | colicin immunity                                                                                   | -                          |                     | N                         | N                  | N                     | Y                          | Y                       |
|         | colicin-E6                                                                                         | -                          |                     | N                         | N                  | N                     | Y                          | N                       |
|         | tellurite/colicin resistance gene                                                                  | -                          |                     | N                         | N                  | N                     | N                          | Y                       |

**Table S12:** Comparison of carbohydrate utilization by *Rosenbergiella* strains (additional tests to those in the EnteroPluri tubes). + Indicates the production of acid.

| Carbohydrate    | <i>R. meliponini</i><br>D21B | <i>Rosenbergiella</i><br>sp. D08K | <i>Rosenbergiella</i><br>sp. D15G | <i>R. epipactidis</i><br>2.1A | <i>R. collisarenosi</i><br>8.8A | <i>R. australiborealis</i><br>CdVSA20.1 | <i>R. nectarea</i><br>8N4 |
|-----------------|------------------------------|-----------------------------------|-----------------------------------|-------------------------------|---------------------------------|-----------------------------------------|---------------------------|
| D-Fructose      | +                            | +                                 | +                                 | +                             | +                               | +                                       | +                         |
| D-Galactose     | +                            | +                                 | +                                 | +                             | +                               | +                                       | +                         |
| D-Mannose       | +                            | +                                 | +                                 | +                             | +                               | –                                       | +                         |
| D-Ribose        | +                            | +                                 | +                                 | +                             | +                               | –                                       | +                         |
| D-Lyxose        | –                            | –                                 | –                                 | –                             | –                               | –                                       | –                         |
| D-Mannitol      | –                            | –                                 | –                                 | –                             | –                               | –                                       | –                         |
| D-Maltose       | –                            | –                                 | –                                 | –                             | –                               | –                                       | –                         |
| Sucrose         | +                            | +                                 | +                                 | +                             | +                               | +                                       | +                         |
| Glycerol        | +                            | +                                 | +                                 | +                             | +                               | +                                       | +                         |
| Trehalose       | –                            | –                                 | –                                 | –                             | –                               | –                                       | –                         |
| Arabinogalactan | –                            | –                                 | –                                 | –                             | n/a                             | n/a                                     | n/a                       |

### Amino acid biosynthesis by *Rosenbergiella* strains

All *Rosenbergiella* isolates from *T. carbonaria* as well as *R. epipactidis* A2.1 could grow in minimal media without addition of amino acids, proving that the investigated *Rosenbergiella* can produce all 20 proteinogenic amino acids.

### Production of vitamins by *Rosenbergiella* strains

#### Carotenoid-like gene cluster

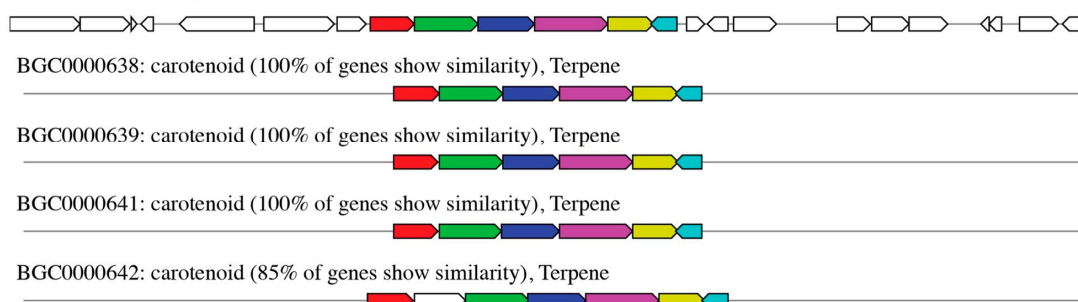

**Figure S9:** *R. meliponini* D21B comprises a carotenoid biosynthetic gene cluster with 100 % similarity to known carotenoid biosynthetic gene clusters[20].

Analysis by antiSMASH [14,15] revealed that *R. meliponini* D21B draft genome contains the full set of genes required for carotenoid biosynthesis (Figure A9 and Table S13). For comparative purposes, the genome assemblies of other four *Rosenbergiella* type strains (*R. epipactidis* 2.1A, *R. nectarea* 8N4, *R. australiborealis* CdVSA20.1 and *R. collisarenosi* 8.8A) were examined. The carotenoid-like gene cluster of *R. meliponini* D21B that was detected at the end of scaffold 18 (Ga0456434\_18\_104611\_111500) was present in all four *Rosenbergiella* type strains. The first gene was identified to code for an YtfJ family protein, and exhibited 56 % peptide sequence identity to the corresponding gene in *Pantoea ananatis* PA13[20], a transcriptional regulator. The following six genes showed 57 %, 52 %, 59 %, 82 %, 63 %, and 66 % sequence identity to carotenoid biosynthetic genes *ctrE*, *ctrX*, *ctrY*, *ctrl*, *ctrB*, and *ctrZ* in *Pantoea ananatis*, respectively [20] (Table S13). A gene downstream of *ctrEXYIBZ* cluster (Ga0456434\_07\_108871\_109395) exhibited 80 % sequence conservation with *idi* gene encoding the isopentenyl diphosphate isomerase in *Pantoea* species, an enzyme that produces the common precursor farnesyl diphosphate (FPP) [21].

**Table S13:** Carotenoid biosynthetic genes in *R. meliponini* D21B and the four reported *Rosenbergiella* species with highest sequence identity to the putative protein sequence to *P. ananatis* PA13 carotenoid biosynthetic genes [20]. Legend: Y indicates a highly conserved gene.

| Gene                                                    | Locus tag                      | % Sequence identity<br>(putative peptide<br>sequence) | <i>R. meliponini</i><br>D21B | <i>R. nectarea</i> | <i>R. epipactidis</i> | <i>R. australiborealis</i> | <i>R. collisarenosi</i> |
|---------------------------------------------------------|--------------------------------|-------------------------------------------------------|------------------------------|--------------------|-----------------------|----------------------------|-------------------------|
| transcriptional<br>regulator                            | Ga0456434_18_<br>104611_105198 | 56 %                                                  | Y                            | Y                  | Y                     | Y                          | Y                       |
| <i>ctrE</i>                                             | Ga0456434_18_<br>105277_106185 | 57 %                                                  | Y                            | Y                  | Y                     | Y                          | Y                       |
| <i>ctrX</i>                                             | Ga0456434_18_<br>106195_107475 | 52 %                                                  | Y                            | Y                  | Y                     | Y                          | Y                       |
| <i>ctrY</i>                                             | Ga0456434_18_<br>107468_108616 | 59 %                                                  | Y                            | Y                  | Y                     | Y                          | Y                       |
| <i>ctrl</i>                                             | Ga0456434_18_<br>108625_110106 | 82 %                                                  | Y                            | Y                  | Y                     | Y                          | Y                       |
| <i>ctrB</i>                                             | Ga0456434_18_<br>110099_111025 | 63 %                                                  | Y                            | Y                  | Y                     | Y                          | Y                       |
| <i>ctrZ</i>                                             | Ga0456434_18_<br>110970_111500 | 66 %                                                  | Y                            | Y                  | Y                     | Y                          | Y                       |
| <i>idi</i> ,<br>isopentenyl<br>diphosphate<br>isomerase | Ga0456434_07_<br>108871_109395 | 80 %                                                  | Y                            | Y                  | Y                     | Y                          | Y                       |

### *Vitamin B<sub>1</sub> (thiamine)*

While some bacteria synthesize thiamine [22,23], some enteric bacteria salvage thiazole (hydroxyethylthiazole; HET) and pyrimidine (hydroxymethylpyrimidine; HMP) from the culture medium using enzymes encoded by *thiM* and *thiD* respectively and produce thiamine monophosphate [24]. Genes that encode for vitamin B<sub>1</sub> synthesizing enzymes (ThiO, ThiJ and TenI) were not found in *R. nectarea*, *R. epipactidis*, *R. australiborealis* and *R. collisarenosi*. However, putative thiamine biosynthetic genes, albeit with low peptide sequence similarity (26%, 41% and 28%, respectively) to ThiO, ThiJ and TenI, were found in the *R. meliponini* draft genome (Table S15). Moreover, *R. meliponini* D21B grew in minimal medium without thiamine, whereas *R. epipactidis* 2.1A grew poorly without thiamine supplementation (see Table S14).

**Table S14:** Growth of *Rosenbergiella* strains (determined by OD<sub>600</sub> measurement) in minimal medium [6] with and without supplementation of vitamin B<sub>1</sub>, vitamin B<sub>3</sub>, vitamin B<sub>5</sub> and vitamin B<sub>12</sub>.

| <b>Vitamin(s)<br/>supplemented</b>                                 | <b><i>R. meliponini</i><br/>D21B</b> | <b><i>Rosenbergiella</i><br/>sp. D08K</b> | <b><i>Rosenbergiella</i><br/>sp. D15G</b> | <b><i>Rosenbergiella</i><br/><i>epipactidis</i> 2.1A</b> |
|--------------------------------------------------------------------|--------------------------------------|-------------------------------------------|-------------------------------------------|----------------------------------------------------------|
| None                                                               | 0.02                                 | 0.05                                      | 0.03                                      | 0.01                                                     |
| B <sub>3</sub>                                                     | 0.65                                 | 0.56                                      | 0.61                                      | 0.08                                                     |
| B <sub>1</sub> , B <sub>3</sub>                                    | 0.76                                 | 0.60                                      | 0.68                                      | 1.06                                                     |
| B <sub>1</sub> , B <sub>3</sub> , B <sub>5</sub> , B <sub>12</sub> | 1.02                                 | 0.99                                      | 0.93                                      | 1.33                                                     |

**Table S15:** Vitamin B<sub>1</sub> biosynthetic genes in *R. meliponini* D21B and the four reported *Rosenbergiella* species with % peptide sequence identity to *E. coli* K12 proteins [22,23]. Legend: Y indicates the presence of a highly conserved gene, and N indicates the absence of a similar gene.

| Gene                                                                     | Locus Tag                  | % putative peptide sequence identity | <i>R. meliponini</i> D21B | <i>R. nectarea</i> 8N4 | <i>R. epipactidis</i> 2.1A | <i>R. australiborealis</i> CdVSA 20.1 | <i>R. collisarenosi</i> 8.8A |
|--------------------------------------------------------------------------|----------------------------|--------------------------------------|---------------------------|------------------------|----------------------------|---------------------------------------|------------------------------|
| Dxs, 1-deoxy-D-xylulose-5-phosphate synthase                             | Ga0456434_02_36603_38468   | 76 %                                 | Y                         | Y                      | Y                          | Y                                     | Y                            |
| PLP cysteine, pyridoxal-5'-phosphate dependant cysteine                  |                            |                                      | N                         | N                      | N                          | N                                     | N                            |
| ThiI, [ThiS-adenylate] sulfur transferase                                | Ga0456434_02_39846_41294   | 79%                                  | Y                         | Y                      | Y                          | Y                                     | Y                            |
| ThiS, sulfur carrier protein                                             |                            |                                      | N                         | Y                      | Y                          | N                                     | Y                            |
| IscS, cysteine desulfurase                                               | Ga0456434_01_46953_48167   | 87%                                  | Y                         | Y                      | Y                          | Y                                     | Y                            |
| ThiF, sulfur carrier protein ThiS adenylyltransferase                    | Ga0456434_07_97357_98115   | 40%                                  | Y                         | Y                      | Y                          | Y                                     | Y                            |
| ThiO, glycine oxidase ( <i>Bacillus subtilis</i> - strain 168)           | Ga0456434_08_92883_93827   | 26%                                  | Y                         | N                      | N                          | N                                     | N                            |
| ThiH, 2-iminoacetate synthase                                            |                            |                                      | N                         | N                      | N                          | N                                     | N                            |
| ThiG, thiazole synthase                                                  | Ga0456434_08_94012_94770   | 41                                   | Y                         | N                      | N                          | N                                     | N                            |
| TenI, transcriptional regulator ( <i>Bacillus subtilis</i> - strain 168) | Ga0456434_19_13551_14174   | 28                                   | Y                         | N                      | N                          | N                                     | N                            |
| ThiC, phosphomethylpyrimidine synthase                                   | Ga0456434_19_14176_16098   | 64                                   | Y                         | Y                      | Y                          | N                                     | Y                            |
| ThiD, hydroxymethyl pyrimidine (phosphate) kinase                        | Ga0456434_10_387234_388052 | 41                                   | Y                         | Y                      | Y                          | N                                     | Y                            |
| ThiE, thiamine phosphate synthase                                        | Ga0456434_19_13551_14174   | 31                                   | Y                         | Y                      | Y                          | N                                     | Y                            |
| ThiL, thiamine phosphate kinase                                          | Ga0456434_02_35581_36576   | 36                                   | Y                         | Y                      | Y                          | Y                                     | Y                            |

### Vitamin B<sub>2</sub> (Riboflavin)

The riboflavin biosynthesis pathway has been studied in *E. coli* K12 [25]. All *Rosenbergiella* genomes contain genes with high similarity to *ribA*, *ribD*, and *ribE*, but *ribH* was not consistently identified across all *Rosenbergiella* genomes (Table S16). Both *R. meliponini* D21B and *R. epipactidis* 2.1A could grow in minimal medium without riboflavin supplementation, suggesting that both *Rosenbergiella* strains can produce riboflavin (Table S14).

**Table S16:** Vitamin B<sub>2</sub> biosynthetic genes in *R. meliponini* D21B and the four reported *Rosenbergiella* species with % of putative protein sequence identity to the *E. coli* K12 vitamin B<sub>2</sub> biosynthetic proteins [25]. Legend: Y indicates the presence of a highly conserved gene, and N indicates the absence of a similar gene.

| Gene                                                       | Locus tag                  | % putative peptide sequence identity | <i>R. meliponini</i> D21B | <i>R. nectarea</i> | <i>R. epipactidis</i> | <i>R. australiborealis</i> | <i>R. collisarenosi</i> |
|------------------------------------------------------------|----------------------------|--------------------------------------|---------------------------|--------------------|-----------------------|----------------------------|-------------------------|
| RibA, GTP cyclohydrolase-2                                 | Ga0456434_10_123815_124408 | 79                                   | Y                         | Y                  | Y                     | Y                          | Y                       |
| RibD, pyrimidine deaminase/riboflavin biosynthesis protein | Ga0456434_02_33435_34553   | 64                                   | Y                         | Y                  | Y                     | Y                          | Y                       |
| RibH, 6,7-dimethyl-8-ribityllumazine synthase              | Ga0456434_02_34632_35102   | 84                                   | Y                         | Y                  | N                     | N                          | N                       |
| RibE, riboflavin synthase                                  | Ga0456434_12_259559_260167 | 72                                   | Y                         | Y                  | Y                     | Y                          | Y                       |



### Vitamin B<sub>3</sub> (Niacin)

Genes associated with niacin biosynthesis are not yet fully characterized in bacteria, although a set of genes that are upregulated in the absence of niacin have been identified as putative niacin biosynthetic genes in *Streptococcus pneumoniae* [26]. These genes include *fba*, *rex*, *gapN*, *niaX*, *pncB-nadE*, *pnuC*, *gap*, *spd-1824*, *nadC*, *adhE*, and *adhB2*. Only four of the abovementioned genes, *fba*, *pncB*, *nadE*, and *pnuC* have been identified across the five *Rosenbergiella* genomes (Table S17). The absence of a fully functional niacin-synthesizing pathway can be inferred from the inability of either *R. epipactidis* 2.1A or *R. meliponini* D21B to grow in minimal medium without niacin supplementation (Table S14).

**Table S17:** Vitamin B<sub>3</sub> biosynthetic genes in *R. meliponini* D21B and the four reported *Rosenbergiella* species with % of putative protein sequence identity to the *Streptococcus pneumoniae* vitamin B<sub>2</sub> biosynthetic proteins [26]. Legend: Y indicates the presence of a highly conserved gene, and N its absence.

| Gene                                                     | Locus Tag                  | % putative peptide sequence identity | <i>R. meliponini</i> D21B | <i>R. nectarea</i> | <i>R. epipactidis</i> | <i>R. australiborealis</i> | <i>R. collisarenosi</i> |
|----------------------------------------------------------|----------------------------|--------------------------------------|---------------------------|--------------------|-----------------------|----------------------------|-------------------------|
| <i>fbaA</i> , fructose-bisphosphate aldolase             | Ga0456434_04_213367_214446 | 26                                   | Y                         | Y                  | Y                     | Y                          | Y                       |
| <i>rex</i> , a redox-sensitive transcriptional regulator |                            |                                      | N                         | N                  | N                     | N                          | N                       |
| <i>pncB</i> , a nicotinate phosphoribosyltransferase     | Ga0456434_07_33276_34481   | 26                                   | Y                         | Y                  | Y                     | Y                          | Y                       |
| <i>nadE</i> , a NAD <sup>+</sup> synthetase              | Ga0456434_12_228069_228896 | 66                                   | Y                         | Y                  | Y                     | Y                          | Y                       |
| <i>gapA</i> , a glyceraldehyde-3-phosphate dehydrogenase | Ga0456434_10_189930_190928 | 51                                   | Y                         | Y                  | Y                     | Y                          | Y                       |
| <i>gapN</i> , a glyceraldehyde-3-phosphate dehydrogenase | Ga0456434_10_48014_49480   | 32                                   | N                         | N                  | N                     | N                          | N                       |

| Gene                                            | Locus Tag                  | % putative peptide sequence identity | <i>R. meliponini</i> D21B | <i>R. nectarea</i> | <i>R. epipactidis</i> | <i>R. australiborealis</i> | <i>R. collisarenosi</i> |
|-------------------------------------------------|----------------------------|--------------------------------------|---------------------------|--------------------|-----------------------|----------------------------|-------------------------|
| adhE, an alcohol dehydrogenase                  | Ga0456434_12_63166 63525   | 33                                   | N                         | N                  | N                     | N                          | N                       |
| adhB2, a zinc-containing alcohol dehydrogenase  |                            |                                      | N                         | N                  | N                     | N                          | N                       |
| NiaX, a niacin ECF transporter                  |                            |                                      | N                         | N                  | N                     | N                          | N                       |
| PnuC, a ribosyl nicotinamide transporter        | Ga0456434_07_145749 146465 | 22                                   | Y                         | Y                  | Y                     | Y                          | Y                       |
| NadC, a nicotinate-nucleotide pyrophosphorylase |                            |                                      | N                         | N                  | N                     | N                          | N                       |

### Vitamin B<sub>5</sub> (Pantothenic acid)

The enzymes associated with pantothenic acid biosynthesis are *ilvD*, *panB*, *panE*, *panD* and *panC* [27,28]. PanM regulates PanD activity. The genes *ilvD*, *panB*, *panE*, and *panC* are conserved in all five sequenced *Rosenbergiella* strains, but no homologues were found for *panD* and *panM* (Table S18). Nevertheless, both *R. meliponini* D21B and *R. epipactidis* 2.1A grew well in minimal medium without supplemented pantothenic acid (Table S14), indicating that they can synthesize this vitamin.

**Table S18:** Vitamin B<sub>5</sub> biosynthetic genes in *R. meliponini* D21B and the four reported *Rosenbergiella* species with % of putative protein sequence identity to the *E. coli* K12 vitamin B<sub>5</sub> biosynthetic proteins [27-29]. Legend: Y indicates the presence of a highly conserved gene, and N indicates the absence of a similar gene.

| Gene                                                   | Locus Tag                  | % Putative peptide sequence identity | <i>R. meliponini</i> D21B | <i>R. nectarea</i> | <i>R. epipactidis</i> | <i>R. australiborealis</i> | <i>R. collisarenosi</i> |
|--------------------------------------------------------|----------------------------|--------------------------------------|---------------------------|--------------------|-----------------------|----------------------------|-------------------------|
| ilvD, dihydroxy-acid dehydratase                       | Ga0456434_13_6468 8318     | 88                                   | Y                         | Y                  | Y                     | Y                          | Y                       |
| PanB, 3-methyl-2-oxobutanoate hydroxymethyltransferase | Ga0456434_06_483760_484557 | 69                                   | Y                         | Y                  | Y                     | Y                          | Y                       |
| PanE, 2-dehydropantoate 2-reductase                    | Ga0456434_02_41879 42796   | 49                                   | Y                         | Y                  | Y                     | Y                          | Y                       |
| PanD, aspartate 1-decarboxylase                        |                            |                                      | N                         | N                  | N                     | N                          | N                       |
| PanM, PanC regulator                                   |                            |                                      | N                         | N                  | N                     | N                          | N                       |
| PanC, pantothenate synthetase                          | Ga0456434_06_482901 483749 | 60                                   | Y                         | Y                  | Y                     | Y                          | Y                       |

### Vitamin B<sub>6</sub> (pyridoxine)

*De novo* biosynthesis of pyridoxine in *E. coli* K12 involves five enzymes: D-erythrose-4-phosphate dehydrogenase (epd), erythronate-4-phosphate dehydrogenase (PdxB), phosphoserine aminotransferase (SerC), 4-hydroxythreonine-4-phosphate dehydrogenase (PdxA), and pyridoxine 5'-phosphate synthase (PdxJ) [30]. All corresponding genes are highly conserved across the *Rosenbergiella* strains examined (Table S19).

**Table S19:** Vitamin B<sub>6</sub> biosynthetic genes in *R. meliponini* D21B the four reported *Rosenbergiella* species with % of putative protein sequence identity to the *E. coli* K12 vitamin B<sub>6</sub> biosynthetic proteins. [30] Y indicates the presence of a highly conserved gene, and N indicates the absence of a similar gene.

| Gene                                               | Locus tag                  | % putative peptide sequence identity | <i>R. meliponini</i> D21B | <i>R. nectarea</i> | <i>R. epipactidis</i> | <i>R. australiborealis</i> | <i>R. collisarenosi</i> |
|----------------------------------------------------|----------------------------|--------------------------------------|---------------------------|--------------------|-----------------------|----------------------------|-------------------------|
| epd, D-erythrose-4-phosphate dehydrogenase         | Ga0456434_04_215738 216766 | 78                                   | Y                         | Y                  | Y                     | Y                          | Y                       |
| PdxB, erythronate-4-phosphate dehydrogenase        | Ga0456434_01_228078 229208 | 64                                   | Y                         | Y                  | Y                     | Y                          | Y                       |
| SerC, aminotransferase                             | Ga0456434_07_62623 63708   | 74                                   | Y                         | Y                  | Y                     | Y                          | Y                       |
| PdxA, 4-hydroxythreonine-4-phosphate dehydrogenase | Ga0456434_06_389457 390449 | 75                                   | Y                         | Y                  | Y                     | Y                          | Y                       |
| PdxJ, pyridoxine 5'-phosphate synthase             | Ga0456434_01_32948 33679   | 74                                   | Y                         | Y                  | Y                     | Y                          | Y                       |

### *Vitamin B<sub>7</sub> (biotin)*

The biotin biosynthesis pathway differs in various bacteria. However, pimelate is a common precursor [31]. The origin of pimelate remains somewhat unclear, But most bacteria have a passive permease that allows the uptake of this dicarboxylic acid into the cell [31]. Pimelate is converted to a pimeloyl-CoA by pimeloyl-CoA synthetase, the gene product of *pauA* in *Pseudomonas mendocina* 35 [32], and *bioW* in *Bacillus sphaericus* [31]. BioW is expressed by the *bioXWF* cluster, where BioX was thought to be a permease, while BioF was identified as the 8-amino-7-oxononanoate synthase. BioWF is a bifunctional enzyme found in some bacterial species including *Corynebacterium kroppenstedtii* [33], which catalyses both the generation of pimeloyl-CoA from pimelate, as well as the decarboxylative condensation of pimeloyl-CoA into (*S*)-8-amino-7-oxononanoate. BioF, which is found in *E.coli* as well as in all *Rosenbergiella* type strains, uses pimeloyl-acyl carrier protein rather than pimeloyl-CoA to produce 8-amino-7-oxononanoate [34,35].

The remaining steps of biotin biosynthesis are catalysed by BioA, BioD2 and BioB [36]. BioA is an adenosylmethionine-8-amino-7-oxononanoate aminotransferase, which produces *S*-adenosyl-4-methylsulfanyl-2-oxobutanoate from (*S*)-8-amino-7-oxononanoate and is conserved in all *Rosenbergiella* strains [37]. BioD2 is an ATP-dependent dethiobiotin synthetase. It was not found in any *Rosenbergiella* strain, but two genes with 50% and 63% protein sequence identity to *bioD* detected in *Mycobacterium tuberculosis* (strain ATCC 25618 / H37Rv) [38] and *bioD1* detected in *Escherichia coli* (strain K12) [39] respectively, which are also ATP-dependent dethiobiotin enzymes, were found in the *R. meliponini* D21B and *R. nectarea* 8N4 genomes (Table S20). BioD is also found in the genomes of *R. epipactidis* 2.1A, *R. australiborealis* CdVSA20.1 and *R. collisarenosi* 8.8A.

**Table S20:** Vitamin B<sub>7</sub> biosynthetic genes in *R. meliponini* D21B and the four reported *Rosenbergiella* species with % of putative protein sequence identity to the *E. coli* K12 vitamin B<sub>7</sub> biosynthetic proteins. Y indicates the presence of a highly conserved gene and N indicates the absence of a similar gene.

| Gene                                                             | Locus tag                  | % putative peptide sequence identity | <i>R. meliponini</i> D21B | <i>R. nectarea</i> | <i>R. epipactidis</i> | <i>R. australiborealis</i> | <i>R. collisarenosi</i> |
|------------------------------------------------------------------|----------------------------|--------------------------------------|---------------------------|--------------------|-----------------------|----------------------------|-------------------------|
| PauA, pimeloyl-CoA synthetase                                    |                            |                                      | N                         | N                  | N                     | N                          | N                       |
| BioW, pimeloyl-CoA synthetase ( <i>Lysinibacillus spericus</i> ) |                            |                                      | N                         | N                  | N                     | N                          | N                       |
| BioF, 8-amino-7-oxononanoate synthase                            | Ga0456434_07_132605_133753 | 56                                   | Y                         | Y                  | Y                     | Y                          | Y                       |
| BioA, adenosylmethionine-8-amino-7-oxononanoate aminotransferase | Ga0456434_07_134866_136155 | 66                                   | Y                         | Y                  | Y                     | Y                          | Y                       |
| BioD1, ATP-dependent dethiobiotin synthetase BioD 1              | Ga0456434_07_131171_131854 | 63                                   | N                         | N                  | N                     | N                          | N                       |
| BioD, ATP-dependent dethiobiotin synthetase BioD                 | Ga0456434_10_74909_75586   | 50                                   | Y                         | Y                  | Y                     | Y                          | Y                       |
| BioD 2, ATP-dependent dethiobiotin synthetase                    |                            |                                      | N                         | N                  | N                     | N                          | N                       |
| BioB, biotin synthase                                            | Ga0456434_07_133753_134784 | 80                                   | Y                         | Y                  | Y                     | Y                          | Y                       |

### Vitamin B<sub>9</sub> (folate)

The folate biosynthesis in *E. coli* requires FolE, FolK, FolP and FolC [40-43]. These genes are well conserved across all *Rosenbergiella* type strains and in *R. meliponini* D21B, except for the apparent absence of a gene corresponding to *folP* in *R. epipactidis* 2.1A. Neither *R. meliponini* D21B nor *R. epipactidis* 2.1A required folate to grow in minimal medium (Table S14).

**Table S21:** Vitamin B<sub>9</sub> biosynthetic genes in *R. meliponini* D21B and the four reported *Rosenbergiella* species with % of putative protein sequence identity to the *E. coli* K12 vitamin B<sub>9</sub> biosynthetic proteins [40-43]. Legend: Y indicates the presence of a highly conserved gene and N indicates the absence of a similar gene.

| Gene                                                                                       | Locus tag                  | % Putative peptide sequence identity | <i>R. meliponini</i> D21B | <i>R. nectarea</i> | <i>R. epipactidis</i> | <i>R. australiborealis</i> | <i>R. collisarenosi</i> |
|--------------------------------------------------------------------------------------------|----------------------------|--------------------------------------|---------------------------|--------------------|-----------------------|----------------------------|-------------------------|
| FolE, GTP cyclohydrolase                                                                   | Ga0456434_10_405220_405885 | 83                                   | Y                         | Y                  | Y                     | Y                          | Y                       |
| FolK, protein Kinase, 2-amino-4-hydroxy-6-hydroxymethyl-dihydropteridine pyrophosphokinase | Ga0456434_06_484640_485119 | 56                                   | Y                         | Y                  | Y                     | Y                          | Y                       |
| FolP, dihydropteroate synthase                                                             | Ga0456434_06_100429_101262 | 74                                   | Y                         | Y                  | Y                     | Y                          | Y                       |
| FolC, dihydrofolate synthase/folypolyglutamate synthase                                    | Ga0456434_01_232901_234154 | 65                                   | Y                         | Y                  | Y                     | Y                          | Y                       |
| YgfZ, folate-binding protein                                                               | Ga0456434_04_194684_195649 | 57                                   | Y                         | Y                  | Y                     | Y                          | Y                       |

*Vitamin B<sub>10</sub> (4-aminobenzoic acid)*

4-Aminobenzoic acid synthesis in *E. coli* is catalysed by PabA, PabB, and PabC, using chorismate as precursor [44,45] producing 4-aminobenzoic acid for the folate biosynthesis pathway. All *Rosenbergiella* strains have genes with high level of conservation to *E. coli* K12 *pabB* and *pabC*.

The *pabA* gene is not well conserved, but it can be inferred that the catalytic activity of this enzyme can be met by another gene because both *R. meliponini* D21B and *R. epipactidis* 2.1A grow in absence of 4-aminobenzoic acid in the minimal (Tables A14, A22).

**Table S22:** Vitamin B<sub>10</sub> biosynthetic genes in *R. meliponini* D21B and the four reported *Rosenbergiella* species with % of putative protein sequence identity to the *E. coli* K12 vitamin B<sub>10</sub> biosynthetic proteins. [44,45] Y indicates the presence of a highly conserved gene, N indicates the absence of a similar gene.

| Gene                                            | Locus tag                  | Putative peptide sequence identity in % | <i>R. meliponini</i> D21B | <i>R. nectarea</i> | <i>R. epipactidis</i> | <i>R. australiborealis</i> | <i>R. collisarenosi</i> |
|-------------------------------------------------|----------------------------|-----------------------------------------|---------------------------|--------------------|-----------------------|----------------------------|-------------------------|
| PabA, aminodeoxychorismate synthase component 2 | Ga0456434_05_140367_140942 | 66                                      | Y                         | Y                  | Y                     | Y                          | Y                       |
| PabB, aminodeoxychorismate synthase component 1 | Ga0456434_10_209006_210379 | 61                                      | Y                         | Y                  | Y                     | Y                          | Y                       |
| PabC, aminodeoxychorismate lyase                | Ga0456434_12_115738_116547 | 52                                      | Y                         | Y                  | Y                     | Y                          | Y                       |



### *Vitamin B<sub>12</sub> (cobalamin)*

Vitamin B<sub>12</sub> (cobalamin) is a cofactor for methyltransferase enzymes [46]. It is synthesized by some bacteria in three steps, while others acquire it [46,47]. The *hemABCDL* operon codes for the synthesis of uroporphyrinogen III, which is a precursor for the production of heme, shiroheme, as well as cobalamin, for example in *Salmonella typhimurium* [48]. The *Cbi* operon from *Bacillus megaterium* that has been shown to synthesize cobalamin under anaerobic conditions [49]. The *cob* operon from *S. typhimurium* biosynthesizes cobalamin under aerobic conditions [50-53]. All five *Rosenbergiella* genomes comprise the *hemABCDL* operon that produces uroporphyrinogen III. However, all *Rosenbergiella* genomes lack *cbi* operon or *cob* operon genes that code for enzymes to produce cobalamin. Cobalamin salvage pathway genes have been identified in *S. typhimurium* [53], however, these genes were not identified in any of the *Rosenbergiella* genomes examined (Table S23). *R. meliponini* D21B and *R. epipactidis* 2.1A grew well in minimal medium lacking vitamin B<sub>12</sub>. However, the presence of a B<sub>12</sub>-independent methyltransferase in the genome of *R. meliponini* D21B (Table S23) may mean that cobalamin is not an essential cofactor.

**Table S23:** Vitamin B<sub>12</sub> biosynthetic genes in *R. meliponini* D21B and the four reported *Rosenbergiella* species with % of putative protein sequence identity to the *S. typhimunum* vitamin B<sub>12</sub> biosynthetic proteins. Y indicates the presence of a highly conserved gene, N indicates the absence of a similar gene, and U indicates ‘uncertain’, where the possible function of the gene product has been observed, but genomic annotation have not revealed a potential gene.

| Gene                                                                         | Locus Tag                   | Putative peptide sequence identity in % | <i>R. meliponini</i> D21B | <i>R. nectarea</i> | <i>R. epipactidis</i> | <i>R. australiborealis</i> | <i>R. collisarenosi</i> |
|------------------------------------------------------------------------------|-----------------------------|-----------------------------------------|---------------------------|--------------------|-----------------------|----------------------------|-------------------------|
| <i>hemABCD</i>                                                               | Ga0456434_01_204964-207227  | 76-99                                   | Y                         | Y                  | Y                     | Y                          | Y                       |
| <i>hemL</i> (glutamate-1-semialdehyde 2,1-aminomutase)                       | Ga0456434_06_494670_495953  | 80                                      | Y                         | Y                  | Y                     | Y                          | Y                       |
| <i>cbi</i> operon genes ( <i>cbiABCDEFGHIJKLMNOQP</i> )                      |                             |                                         | N                         | N                  | N                     | N                          | N                       |
| <i>cob</i> operon genes                                                      |                             |                                         | N                         | N                  | N                     | N                          | N                       |
| <b>Cobalamin salvage pathway genes</b>                                       |                             |                                         |                           |                    |                       |                            |                         |
| CysG, siroheme synthase                                                      | Ga0456434_04_49147_50562    | 94                                      | Y                         | Y                  | Y                     | N                          | Y                       |
| btuB, Vit B12 transporter BtuB ( <i>Escherichia hermannii</i> ) [54]         | Ga0456434_08_81185_83302    | 25                                      | U                         | N                  | N                     | N                          | N                       |
| btuF, YadT, Vitamin B <sub>12</sub> -binding protein                         | Ga0456434_18_65337_66170    | 27                                      | U                         | N                  | N                     | N                          | N                       |
| butC, Vit B12 import system permease protein                                 | Ga0456434_18_66154_67158    | 39                                      | U                         | N                  | N                     | N                          | N                       |
| BtuD, Vitamin B12 import ATP-binding protein                                 | Ga0456434_18_67151_67930    | 33                                      | U                         | N                  | N                     | N                          | N                       |
| Methionine synthase (MetH) ( <i>E. coli</i> K12)                             |                             |                                         | N                         | N                  | N                     | N                          | N                       |
| Methionine synthase (B <sub>12</sub> -independent) ( <i>R. nectarea</i> 8N4) | Ga0456434_06_16_4293_165324 | 99                                      | Y                         | Y                  | Y                     | Y                          | Y                       |
| Methylmalonyl-CoA mutase ( <i>scpA</i> )                                     |                             |                                         | N                         | N                  | N                     | N                          | N                       |

Vitamin K (menaquinone) synthesis genes as described in *Bacillus subtilis* [55,56] appear to be missing in all *Rosenbergiella* strains, except for ubiquinone/menaquinone biosynthesis C-methyltransferase (Table S24).

**Table S24:** Potential vitamin K biosynthetic genes in *R. meliponini* D21B and the four reported *Rosenbergiella* species in comparison to their annotated counterparts from *E. coli* K12 strain. Y indicates the presence of a highly conserved gene, N indicates the absence of a similar gene.

| Gene                                                                          | Locus tag                  | Putative peptide sequence identity in % | <i>R. meliponini</i> D21B | <i>R. nectarea</i> | <i>R. epipactidis</i> | <i>R. australiborealis</i> | <i>R. collisarenosi</i> |
|-------------------------------------------------------------------------------|----------------------------|-----------------------------------------|---------------------------|--------------------|-----------------------|----------------------------|-------------------------|
| menB, 1,4-dihydroxy-2-naphthoyl-CoA synthase                                  |                            |                                         | N                         | N                  | N                     | N                          | N                       |
| menC, o-succinylbenzoate synthase                                             |                            |                                         | N                         | N                  | N                     | N                          | N                       |
| menD, 2-succinyl-5-enolpyruvyl-6-hydroxy-3-cyclohexene-1-carboxylate synthase |                            |                                         | N                         | N                  | N                     | N                          | N                       |
| menE, 2-succinylbenzoate--CoA ligase                                          |                            |                                         | N                         | N                  | N                     | N                          | N                       |
| menF, Isochorismate synthase<br>MenF                                          |                            |                                         | N                         | N                  | N                     | N                          | N                       |
| menA, 1,4-dihydroxy-2-naphthoate octaprenyltransferase                        |                            |                                         | N                         | N                  | N                     | N                          | N                       |
| ubiE, ubiquinone/menaquinone biosynthesis C-methyltransferase                 | Ga0456434_13_154840_155595 | 85                                      | Y                         | Y                  | Y                     | Y                          | Y                       |
| ubiquinone biosynthesis protein UbiJ                                          | Ga0456434_13_155595_156200 | 46                                      | Y                         | Y                  | N                     | N                          | N                       |

## Biosynthesis of 2-phenylethanol

Phenylalanine, which is precursor in the production of 2-phenylethanol, can be synthesized by all *Rosenbergiella* strains via the shikimate pathway (Table S25) [57]. 2-Phenylethanol biosynthesis in *Proteus mirabilis* (order Enterobacterales) has been investigated in detail [58]. Eleven enzymes, including five aminotransferases, two decarboxylases and four alcohol dehydrogenases are involved in 2-phenylethanol synthesis via three different biochemical pathways: the amino acid deaminase (AAD) pathway, the Ehrlich pathway, and the aromatic amino acid decarboxylase (AADC) pathway.

### Amino acid deaminase (AAD) pathway

The amino acid deaminase (AAD) pathway utilizes an L-amino acid deaminase (*Pma* and *Pml*), an  $\alpha$ -keto acid decarboxylase (KDC) and an alcohol dehydrogenase (ADH) for the conversion of L-phenylalanine into 2-phenylethanol (Figure A10). The *R. meliponini* D21B genome contains a gene with 70 % peptide sequence identity to *P. mirabilis* L-amino acid deaminase. An  $\alpha$ -keto acid decarboxylase (KDC) converts phenylpyruvate (PPA) to phenylacetaldehyde (PAAL). However, the *R. meliponini* D21B draft genome lacks any gene with high homology to the *P. mirabilis*  $\alpha$ -keto acid decarboxylase. In the final step an alcohol dehydrogenase (ADH) converts 2-phenylacetaldehyde to 2-phenylethanol. *R. meliponini* D21B and all other four *Rosenbergiella* species contain at least one gene that encodes for a class 4 alcohol dehydrogenase (ADH) (Table S26).

### The Ehrlich pathway

The Ehrlich pathway converts L-phenylalanine into 2-phenylethanol in three steps: transamination of L-phenylalanine, decarboxylation of L-phenylalanine, and reduction of the aldehyde moiety [59-61]. L-phenylalanine is converted to phenylpyruvic acid (PAA) by the aromatic amino acid transaminase (AAAT) type 1 and type 2 (AAAT-2), for both there are candidate genes in *R. meliponini* D21B. Then the PAA is converted to phenylacetaldehyde (PAAL) by keto acid decarboxylases. The *R. meliponini* D21B draft genome comprises a gene with 36 % peptide sequence identity to the *P. mirabilis* keto acid decarboxylase. The last step of the Ehrlich pathway is the reduction of phenylacetaldehyde into 2-phenylethanol using ADH, which appears to be available to all *Rosenbergiella* strains isolated from *T. carbonaria*.

### Aromatic amino acid decarboxylase (AADC) pathway

The third, possible pathway that 2-phenylethanol is synthesized is via the aromatic amino acid decarboxylase (AADC) pathway. In *P. mirabilis*, the initial conversion of L-phenylalanine to 2-phenylethylamine is catalysed by a pyridoxal-dependent decarboxylase. The closest match to this gene region in *R. meliponini* D21B only shares a 30 % peptide sequence identity with the

*P. mirabilis* counterpart, making it unlikely that this gene encodes an enzyme with the similar function. Subsequently in the pathway, L-aromatic amino acid transferase (AAAT) converts the 2-phenylethylamine into the aldehyde form, 2-phenylacetaldehyde. However, it was noted that the catalytic activity of AAATs towards 2-PEA was about 1000 fold less in comparison to its activity towards L-phenylalanine, indicating that 2-phenylalanine is the preferred substrate (as discussed above in the amino acid deaminase (AAD) pathway). The final step, as in the pathways discussed before, is the reduction of 2-phenylacetaldehyde into 2-phenylethanol by an alcohol dehydrogenase (ADH). Genes that could encode a type 4 ADH are present in all five *Rosenbergiella* genomes examined (Table S26). However, while not all *Rosenbergiella* examined here produced 2-phenylethanol, 2-phenylacetic acid was a ubiquitous product (Figure 8). This most likely arises from the oxidation of 2-phenylacetaldehyde rather than reduction. The *R. meliponini* D21B draft genome shows the presence of two aldehyde dehydrogenase encoding genes (Table S26).

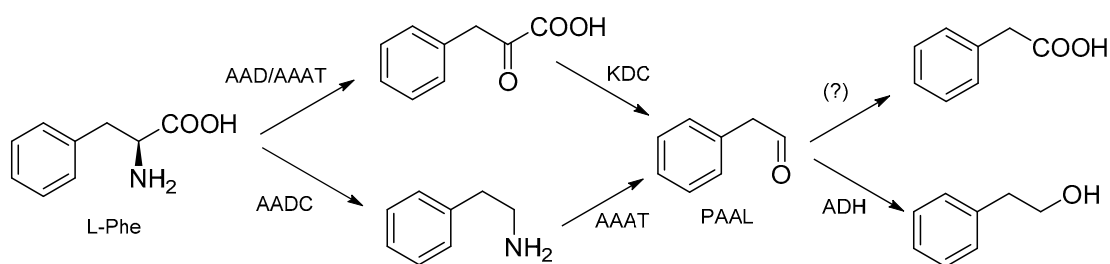

**Figure A10:** Biochemical pathways for the synthesis of 2-phenylethanol and 2-phenylacetic acid, based on those described for *Proteus mirabilis* [58]. All pathways lead to 2-phenylacetaldehyde (PAAL) as the preultimate intermediate. AAT: L-amino acid deaminase, AAAT: L-aromatic amino acid transferase, KDC: α-keto acid decarboxylase, ADH: Alcohol dehydrogenase, and (?): unknown, step not described for *P. mirabilis*. Possibly catalysed by aldehyde dehydrogenase.

**Table S25:** Conservation of the shikimate pathway genes in *R. meliponini* D21B and the four reported *Rosenbergiella* species with % of putative protein sequence identity to the *E. coli* K12 shikimate pathway biosynthetic proteins.

| Gene                                                           | Locus tag                  | Peptide<br>sequence<br>identity in % | <i>R.</i><br><i>meliponini</i><br>D21B | <i>R.</i><br><i>nectarea</i> | <i>R.</i><br><i>epipactidis</i> | <i>R.</i><br><i>australiborealis</i> | <i>R.</i><br><i>collisarenosi</i> |
|----------------------------------------------------------------|----------------------------|--------------------------------------|----------------------------------------|------------------------------|---------------------------------|--------------------------------------|-----------------------------------|
| aroG/DAHP, 3-deoxy-D-arabinoheptulosonate-7-phosphate synthase | Ga0456434_12_222768_223622 | 24 %                                 | Y                                      | Y                            | Y                               | Y                                    | Y                                 |
| aroB/ DHQ synthase, 2,3-dehydroquinase synthase                | Ga0456434_05_132683_133765 | 77 %                                 | Y                                      | Y                            | Y                               | Y                                    | Y                                 |
| aroC/DH-quinase, 3,3-dehydroquinase dehydratase                | Ga0456434_05_132683_133765 | 77 %                                 | Y                                      | Y                            | Y                               | Y                                    | Y                                 |
| aroE/ shikimate_DH,shikimate dehydrogenase                     | Ga0456434_03_26019_26840   | 55 %                                 | Y                                      | Y                            | Y                               | Y                                    | Y                                 |
| aroK/SKI, shikimate kinase                                     | Ga0456434_05_132122_132643 | 93 %                                 | Y                                      | Y                            | Y                               | Y                                    | Y                                 |
| aroA/ EPSP, 5-enolpyruvyl-shikimate-3-phosphate synthase       | Ga0456434_07_61285_62577   | 79 %                                 | Y                                      | Y                            | Y                               | Y                                    | Y                                 |
| aroC, chorismate synthase                                      | Ga0456434_01_215097_216176 | 84 %                                 | Y                                      | Y                            | Y                               | Y                                    | Y                                 |

**Table S26:** Conservation of the Ehrlich pathway genes in *R. meliponini* D21B and the four reported *Rosenbergiella* species with % of putative protein sequence identity to 2-phenylethanol synthesising genes of *P. mirabilis*.

| Gene                                                                    | Locus tag                       | Peptide<br>sequence<br>identity in % | <i>R.</i><br><i>meliponini</i><br>D21B | <i>R.</i><br><i>nectarea</i> | <i>R.</i><br><i>epipactidis</i> | <i>R.</i><br><i>australiborealis</i> | <i>R.</i><br><i>collisarenosi</i> |
|-------------------------------------------------------------------------|---------------------------------|--------------------------------------|----------------------------------------|------------------------------|---------------------------------|--------------------------------------|-----------------------------------|
| <i>Pma</i> (WP_004246855.1)                                             | Ga0456434_08_83571_84992        | 54                                   | Y                                      | N                            | N                               | N                                    | N                                 |
| <b><i>Pm1</i> (WP_004248621.1)</b>                                      | <b>Ga0456434_08_83571_84992</b> | <b>70</b>                            | <b>Y</b>                               | <b>N</b>                     | <b>N</b>                        | <b>N</b>                             | <b>N</b>                          |
| KDC: $\alpha$ -keto acid decarboxylase<br>(WP_012367760.1)              | Ga0456434_12_167796_169478      | 36                                   | Y                                      | Y                            | Y                               | Y                                    | Y                                 |
| ADH: alcohol dehydrogenase IV,<br>ADH-4                                 | Ga0456434_10_332502_333611      | 83                                   | Y                                      | Y                            | Y                               | Y                                    | Y                                 |
| AAAT: L-aromatic amino acid<br>transaminase, AAAT-1<br>(WP_012368490.1) | Ga0456434_18_20030_21214        | 61                                   | Y                                      | Y                            | Y                               | Y                                    | Y                                 |
| L-aromatic amino acid<br>transaminase, AAAT-2<br>(WP_012367734.1)       | Ga0456434_07_37464_38657        | 65                                   | Y                                      | Y                            | Y                               | Y                                    | Y                                 |
| pyridoxal-dependent decarboxylase<br>(WP_017628132.1)                   | Ga0456434_08_74680_76209        | 30                                   | Y                                      | Y                            | Y                               | N                                    | Y                                 |
|                                                                         |                                 |                                      |                                        |                              |                                 |                                      |                                   |

| Gene                                                                        | Locus tag                  | Peptide<br>sequence<br>identity in % | <i>R.</i><br><i>meliponini</i><br>D21B | <i>R.</i><br><i>nectarea</i> | <i>R.</i><br><i>epipactidis</i> | <i>R.</i><br><i>australiborealis</i> | <i>R.</i><br><i>collisarenosi</i> |
|-----------------------------------------------------------------------------|----------------------------|--------------------------------------|----------------------------------------|------------------------------|---------------------------------|--------------------------------------|-----------------------------------|
| aldehyde dehydrogenase ( <i>R.</i><br><i>epipactidis</i> ) (WP_214216111.1) | Ga0456434_12_185485_187005 | 99                                   | Y                                      | Y                            | Y                               | Y                                    | Y                                 |
| aldehyde dehydrogenase ( <i>R.</i><br><i>epipactidis</i> ) (WP_214216226.1) | Ga0456434_10_48014_49480   | 99                                   | Y                                      | N                            | N                               | N                                    | N                                 |



## Resistance to environmental challenges

### Antibiotic resistance

Antibiotic resistance mechanisms in bacteria involve restricting uptake, inactivation, or the modification of antimicrobial targets, as well as removal of xenobiotics [62]. IMG annotation and manual searches have not succeeded in detecting any genes in the *R. meliponini* D21B genome that are associated with the first three resistance mechanisms, however genes encoding for at least three distinct multidrug efflux pumps were identified (Table S27). KEGG Orthology (KO) database predicted the first gene (locus tags: Ga0456434\_04\_310767-Ga0456434\_04\_313901) to be homologous to *acrB*, *mexB*, *adeJ*, *smeE*, *mtrD*, *cmeB* multidrug efflux pumps. The second gene (Ga0456434\_04\_127933\_ Ga0456434\_04\_131124) and the third gene (Ga0456434\_04\_124832- Ga0456434\_04\_127936) are predicted to encode for MdtB and MdtC, respectively. The mdtABC complex is a known *E. coli* efflux pump, and it confers resistance to novobiocin and deoxycholate [63,64]. A fourth gene (locus tags: Ga0456434\_02\_68155-Ga0456434\_02\_71271) is predicted to encode for the pore domain of the multidrug efflux transporter AcrB, which confers resistance to a wide variety of antibiotics in *E. coli* [65].

**Table S27:** Genes associated with multidrug efflux pumps from *R. meliponini* D21B and the four reported *Rosenbergiella* type strains

| <i>R. meliponini</i> D21B                            | Locus tag                  | <i>R. nectarea</i> | <i>R. epipactidis</i> | <i>R. australiborealis</i> | <i>R. collisarenosi</i> |
|------------------------------------------------------|----------------------------|--------------------|-----------------------|----------------------------|-------------------------|
| membrane fusion protein<br>(multidrug efflux system) | Ga0456434_02_71300-72478   | Y                  | Y                     | Y                          | Y                       |
|                                                      | Ga0456434_04_131124-13235  |                    |                       |                            |                         |
|                                                      | Ga0456434_04_313917-315047 |                    |                       |                            |                         |
| multidrug efflux pump                                | Ga0456434_02_68155_71271   | Y                  | Y                     | Y                          | Y                       |
|                                                      | Ga0456434_04_124832_127936 |                    |                       |                            |                         |
|                                                      | Ga0456434_04_127933_131124 |                    |                       |                            |                         |
|                                                      | Ga0456434_04_310767_313901 |                    |                       |                            |                         |
| multidrug efflux system<br>membrane fusion protein   | Ga0456434_04_131124_132350 | Y                  | Y                     | Y                          | Y                       |
|                                                      | Ga0456434_04_309374_310774 |                    |                       |                            |                         |

### Genes associated with virulence of *R. meliponini* D21B

The genome of *R. meliponini* D21B contains several hemolysin-associated genes, as well as genes that protect against osmotic, oxidative and acid stress, which are also present in the *R. nectarea* 8N4 genome. The *R. meliponini* D21B genome contains many genes that encode fimbrial associated proteins, which are lacking in the *R. nectarea* 8N4 genome (Table S28). In contrast to *R. nectarea* 8N4, *R. meliponini* D21B does not comprise genes associated with pectin lyase or the P2-like prophage.

**Table S28:** Virulence factor genes in *R. meliponini* D21B and other four *Rosenbergiella* type strains.

| Virulence factor                                             | Locus tag                  | <i>R. meliponini</i> D21B | <i>R. nectarea</i> | <i>R. epipactidis</i> | <i>R. australiborealis</i> | <i>R. collisarenosi</i> |
|--------------------------------------------------------------|----------------------------|---------------------------|--------------------|-----------------------|----------------------------|-------------------------|
| Pectin lyase                                                 |                            | N                         | Y                  | N                     | N                          | N                       |
| Pectate lyase                                                |                            | N                         | Y                  | N                     | N                          | N                       |
| P2-like prophage                                             |                            | N                         | Y                  | N                     | N                          | N                       |
| Elongation factor P hydroxylase                              | Ga0456434_01_217837-218382 | Y                         | Y                  | Y                     | Y                          | Y                       |
| Adhesion                                                     |                            |                           |                    |                       |                            |                         |
| Filamentous hemagglutinin                                    | Ga0456434_04_141414-149411 | Y                         | Y                  | Y                     | Y                          | Y                       |
| Fimbria synthesis                                            |                            |                           |                    |                       |                            |                         |
| Major type-1 subunit fimbrin (pilin, fimA)                   | Ga0456434_04_27862-28410   | Y                         | Y                  | Y                     | Y                          | N                       |
| <b>Hemolysin</b>                                             |                            |                           |                    |                       |                            |                         |
| Hemolysin, contains CBS domains                              |                            | N                         | N                  | N                     | N                          | N                       |
| ShlB/FhaC/HecB family hemolysin secretion/activation protein | Ga0456434_04_149422_151173 | Y                         | Y                  | Y                     | Y                          | Y                       |
| Multispecies hemolysin family protein                        |                            | N                         | Y                  | N                     | N                          | Y                       |
| Hemolysin III family protein                                 | Ga0456434_04_195720_196373 | Y                         | Y                  | Y                     | Y                          | Y                       |
| Hemolysin expression modulator Hha                           | Ga0456434_02_67237_67461   | Y                         | Y                  | Y                     | Y                          | Y                       |

| Virulence factor                                                                            | Locus tag                  | <i>R. meliponini</i> D21B | <i>R. nectarea</i> | <i>R. epipactidis</i> | <i>R. australiborealis</i> | <i>R. collisarenosi</i> |
|---------------------------------------------------------------------------------------------|----------------------------|---------------------------|--------------------|-----------------------|----------------------------|-------------------------|
| <b>Motility</b>                                                                             |                            |                           |                    |                       |                            |                         |
| <i>cyclo</i> -di-GMP-binding flagellar-brake protein YcgR, contains PilZNR and PilZ domains |                            | N                         | N                  | N                     | N                          | N                       |
| flagellum synthesis protein FlgN                                                            | Ga0456434_12_92936_93364   | Y                         | Y                  | Y                     | Y                          | Y                       |
| negative regulator of flagellin synthesis FlgM                                              | Ga0456434_12_93354_93656   | Y                         | Y                  | Y                     | Y                          | Y                       |
| flagellum basal body P-ring formation protein FlgA                                          | Ga0456434_12_93748_94392   | Y                         | Y                  | Y                     | Y                          | Y                       |
| flagellar basal-body rod protein FlgB                                                       | Ga0456434_12_94542_94952   | Y                         | Y                  | Y                     | Y                          | Y                       |
| flagellar basal-body rod protein FlgC                                                       | Ga0456434_12_94966_95364   | Y                         | Y                  | Y                     | Y                          | Y                       |
| flagellar basal-body rod modification protein FlgD                                          | Ga0456434_12_95378_96046   | Y                         | Y                  | Y                     | Y                          | Y                       |
| flagellar hook protein FlgE                                                                 | Ga0456434_12_96063_97265   | Y                         | Y                  | Y                     | Y                          | Y                       |
| flagellar basal-body rod protein FlgF                                                       | Ga0456434_12_97281_98042   | Y                         | Y                  | Y                     | Y                          | Y                       |
| flagellar basal-body rod protein FlgG                                                       | Ga0456434_12_98055_98837   | Y                         | Y                  | Y                     | Y                          | Y                       |
| flagellar L-ring protein precursor FlgH                                                     | Ga0456434_12_98885_99580   | Y                         | Y                  | Y                     | Y                          | Y                       |
| flagellar P-ring protein precursor FlgI                                                     | Ga0456434_12_99593_100693  | Y                         | Y                  | Y                     | Y                          | Y                       |
| flagellar protein FlgJ                                                                      | Ga0456434_12_100693_101601 | Y                         | Y                  | Y                     | Y                          | Y                       |
| flagellar hook-associated protein 1 FlgK                                                    | Ga0456434_12_101698_103332 | Y                         | Y                  | Y                     | Y                          | Y                       |
| flagellar hook-associated protein 3 FlgL                                                    | Ga0456434_12_103354_104316 | Y                         | Y                  | Y                     | Y                          | Y                       |
| MAF protein (musculoaponeurotic fibrosarcoma), a transcription factor                       | Ga0456434_12_108841_109428 | Y                         | Y                  | Y                     | Y                          | Y                       |

### Acid stress responses

In bacteria, acid stress usually induces changes in cell membrane integrity and fluidity, pH homeostasis, metabolic regulation and macromolecular repair [66]. The genome of *R. meliponini* D21B comprises two monovalent cation antiporters of the CPA2 and NhaA families, as well as a potassium efflux system protein KefB, all of which are responsible for maintaining the cellular pH [67-69]. Cyclopropanation of unsaturated phospholipids has been identified as an acid stress response [70]. All sequenced *Rosenbergiella* strains, including *R. meliponini* D21B, carry a cyclopropane-fatty-acyl-phospholipid synthase gene (Table S29).

**Table S29:** Genes associated with acid stress responses in *R. meliponini* D21B and the four reported *Rosenbergiella* species. Percentage peptide sequence identity for each gene is shown in comparison to the characterized gene from *E. coli* K12 extracted from UniProt (uniprot.org), unless an alternative source is specified.

| Genes associated with acid stress responses                   | Locus tag                  | Peptide sequence identity in % | <i>R. meliponini</i> D21B | <i>R. nectarea</i> | <i>R. epipactidis</i> | <i>R. australiborealis</i> | <i>R. collisarenosi</i> |
|---------------------------------------------------------------|----------------------------|--------------------------------|---------------------------|--------------------|-----------------------|----------------------------|-------------------------|
| Potassium efflux system, KefB                                 | Ga0456434_02_82917-84608   | 75                             | Y                         | Y                  | Y                     | Y                          | Y                       |
| Glutathione-regulated potassium-efflux system protein, KefC   | Ga0456434_05_151168-152979 | 42                             | Y                         | Y                  | Y                     | Y                          | Y                       |
| NhaA (Na <sup>+</sup> /H <sup>+</sup> antiporter like domain) | Ga0456434_02_99635-100780  | 49                             | Y                         | Y                  | Y                     | Y                          | Y                       |
| cyclopropane-fatty-acyl-phospholipid synthase                 | Ga0456434_12_260203-261351 | 79                             | Y                         | Y                  | Y                     | Y                          | Y                       |

## Osmotic stress

Aquaporins are fundamental for the maintenance of the cellular osmotic balance by the transfer of water across the membrane. Well-known bacterial aquaporins, including aquaporin Z (AqpZ) from *B. cereus* are not found in any of the *Rosenbergiella* strains (Table S30). However, *E. coli* ProX is a glycerol uptake facilitator protein [71] that is closely related to aquaporin family proteins from many Enterobacteriaceae. It is found in *R. meliponini* D21B and all *Rosenbergiella* strains except in *R. epipactidis* 2.1A. ProX is part of the ProU ABC transporter complex that imports the osmoprotectant glycine betaine into the cells [71,72]. A gene annotated as OsmY, a possible osmoprotectant import permease protein, with 42 % peptide sequence identity to the *E. coli* K12 counterpart, was found in *R. meliponini* D21B. *R. epipactidis* 2.1A, *R. nectarea* 84N, *R. australiborealis* CdVSA20.1 and *R. collisarenosi* 8.8A have genes with 97 %, 85 %, 70 % and 77 % peptide sequence identity to OsmY, respectively.

**Table S30:** Genes associated with osmotic stress responses in *R. meliponini* D21B and the four reported *Rosenbergiella* species. Percentage peptide sequence identity is not shown (denoted ‘n/a’) when the product of the gene discussed, have been characterized in the IMG annotation process. Percentage peptide sequence identity for each gene is shown in comparison to the characterized gene from *E. coli* K12 extracted from UniProt (uniprot.org). Y indicates the presence of a highly conserved gene, N indicates the absence of a similar gene.

| Genes associated with osmotic stress responses           | Locus tag                  | Peptide sequence identity in % | <i>R. meliponini</i> D21B | <i>R. nectarea</i> | <i>R. epipactidis</i> | <i>R. australiborealis</i> | <i>R. collisarenosi</i> |
|----------------------------------------------------------|----------------------------|--------------------------------|---------------------------|--------------------|-----------------------|----------------------------|-------------------------|
| betA, choline dehydrogenase                              | Ga0456434_04_328863-330494 | n/a                            | Y                         | Y                  | Y                     | Y                          | Y                       |
| Choline/glycine/proline-betaine transport protein        | Ga0456434_06_333425-335455 | n/a                            | Y                         | Y                  | Y                     | Y                          | Y                       |
| Betaine aldehyde dehydrogenase                           | Ga0456434_01_89572-91002   | n/a                            | Y                         | Y                  | Y                     | Y                          | Y                       |
| MFS transporter, MHS family, proline/betaine transporter | Ga0456434_04_320581-322089 | n/a                            | Y                         | Y                  | Y                     | Y                          | Y                       |
| Osmotically inducible protein OsmY,                      | Ga0456434_10_164806-165120 | 42                             | Y                         | Y                  | Y                     | Y                          | Y                       |
| Hyperosmotically inducible protein                       | Ga0456434_04_264467-265048 | n/a                            | Y                         | Y                  | Y                     | Y                          | Y                       |
| Osmotically inducible lipoprotein OsmB                   | Ga0456434_10_119939-120157 | 67                             | Y                         | Y                  | Y                     | Y                          | Y                       |
| Osmotically inducible lipoprotein OsmC                   | Ga0456434_02_15500-15931   | 74                             | Y                         | Y                  | Y                     | Y                          | Y                       |
| Osmotically inducible lipoprotein OsmE                   | Ga0456434_12_230365-230706 | 53                             | Y                         | Y                  | Y                     | Y                          | Y                       |

| Genes associated with osmotic stress responses                                  | Locus tag                  | Peptide sequence identity in % | <i>R. meliponini</i> D21B | <i>R. nectarea</i> | <i>R. epipactidis</i> | <i>R. australiborealis</i> | <i>R. collisarenosi</i> |
|---------------------------------------------------------------------------------|----------------------------|--------------------------------|---------------------------|--------------------|-----------------------|----------------------------|-------------------------|
| Miniconductance mechanosensitive channel (protection against hypoosmotic shock) | Ga0456434_06_416205-417473 | 62                             | Y                         | Y                  | Y                     | Y                          | Y                       |
| AqpZ, aquaporin Z                                                               |                            |                                | N                         | N                  | N                     | N                          | N                       |
| ProX, part of the ProU ABC transporter complex                                  | Ga0456434_14_11021-11998   | 69                             | Y                         | Y                  | N                     | Y                          | Y                       |
| ABC transporter proteins                                                        | Ga0456434_03_2083-3222     |                                | Y                         | Y                  | Y                     | Y                          | Y                       |



## **Oxidative stress responses**

In bacteria, oxidative stress responses are mediated by either the peroxide stimulon or the superoxide stimulon, where each pathway is encoded by about 30 genes [73-76]. These systems are under the control of OxyR and SoxRS regulators, which are positive regulatory elements. OxyR regulates the peroxide stimulus, which includes gene elements such as *fur* [77], alkyl hydroperoxide reductase C and F [78], and Dps (DNA protection during starvation protein) [79] [80]. Most bacterial oxidative stress response elements examined, are conserved in *Rosenbergiella* strains consistently (Table S31), except for catalase peroxidase (*katG*), and alkyl hydroperoxide reductase C (*AhpC*), which was not found in the *R. meliponini* D21B genome. Data shown (bold and with asterix) for *ahpC*, were from *R. epipactidis* 2.1A, and the absence of this gene in the *R. meliponini* D21B genome may be due to missing genes in the draft genome, since in all other *Rosenbergiella* genomes *ahpC* is highly conserved with 86-87 % peptide sequence identity with its *E. coli* K12 counterpart.

**Table S31:** Genes associated with oxidative stress responses in *R. meliponini* D21B and the four reported *Rosenbergiella* species. Percentage peptide sequence identity for each gene is shown in comparison to the characterized gene from *E. coli* K12 extracted from UniProt (uniprot.org), unless an alternative source is specified.

|                                                                         | Locus tag                  | % Peptide sequence identity | <i>R. meliponini</i> D21B | <i>R. nectarea</i> | <i>R. epipactidis</i> | <i>R. australiborealis</i> | <i>R. collisarenosi</i> |
|-------------------------------------------------------------------------|----------------------------|-----------------------------|---------------------------|--------------------|-----------------------|----------------------------|-------------------------|
| AhpC, peroxiredoxin (alkyl hydroperoxide reductase subunit C)           | Ga0456434_01_130071_130538 | 86                          | Y                         | Y                  | Y                     | Y                          | Y                       |
| Thiol peroxidase (atypical 2-Cys peroxiredoxin)                         | Ga0456434_10_103805_104308 | 69                          | Y                         | Y                  | Y                     | Y                          | Y                       |
| OxyR, LysR family hydrogen peroxide-inducible transcriptional activator | Ga0456434_08_163537_164454 | 86                          | Y                         | Y                  | Y                     | Y                          | Y                       |
| SoxR, MerR family redox-sensitive transcriptional activator             | Ga0456434_06_190171_190692 | 68                          | Y                         | Y                  | Y                     | Y                          | Y                       |
| SoxS, AraC family mar-sox-rob regulon transcriptional activator         | Ga0456434_06_189710_190075 | 63                          | Y                         | Y                  | Y                     | Y                          | Y                       |
| <b>Peroxide stimulon</b>                                                |                            |                             |                           |                    |                       |                            |                         |
| <i>katG</i> , catalase-peroxidase                                       |                            |                             | N                         | N                  | N                     | N                          | N                       |
| <i>gor</i> , glutathione reductase                                      |                            |                             | N                         | N                  | N                     | N                          | N                       |
| <i>ahpC</i> , alkyl hydroperoxide reductase C                           | Ga0456434_10_396448_39701  | 86                          |                           | Y                  | Y                     | Y                          | Y                       |

|                                                                                                                                                                    | Locus tag                         | % Peptide<br>sequence<br>identity | <i>R. meliponini</i> D21B | <i>R. nectarea</i> | <i>R. epipactidis</i> | <i>R.<br/>australiborealis</i> | <i>R.<br/>collisarenosi</i> |
|--------------------------------------------------------------------------------------------------------------------------------------------------------------------|-----------------------------------|-----------------------------------|---------------------------|--------------------|-----------------------|--------------------------------|-----------------------------|
| <i>ahpF</i> , Alkyl hydroperoxide reductase subunit F                                                                                                              | Ga0456434_10_394817_396382        | 73                                | Y                         | Y                  | Y                     | Y                              | Y                           |
| <i>oxyS</i> (hydrogen peroxide-inducible genes activator) (Uniprot accession number: L7N677_MYCTU from <i>Mycobacterium tuberculosis</i> strain ATCC 25618 / H37Rv |                                   |                                   | N                         | N                  | N                     | N                              | N                           |
| <i>dps</i> , DNA protection during starvation protein                                                                                                              | Ga0456434_07_103434_103937        | 77                                | Y                         | Y                  | Y                     | Y                              | Y                           |
| <i>fur</i> , ferric uptake regulation protein                                                                                                                      | Ga0456434_07_179067_179513        | 87                                | Y                         | N                  | N                     | Y                              | Y                           |
| <i>grxA</i> , glutaredoxin 1                                                                                                                                       | Ga0456434_07_91735_91998          | 66                                | Y                         | N                  | Y                     | N                              | Y                           |
| <b>Superoxide stimulon</b>                                                                                                                                         |                                   |                                   |                           |                    |                       |                                |                             |
| <i>sodA</i> , superoxide dismutase (Binds 1 Mn <sup>2+</sup> ion per subunit)                                                                                      | Fe-Mn family superoxide dismutase | 86                                | Y                         | Y                  | Y                     | Y                              | Y                           |
| <i>nfo</i> , endonuclease 4                                                                                                                                        | Ga0456434_10_409600_410439        | 79                                | Y                         | Y                  | Y                     | Y                              | Y                           |
| <i>zwf</i> , glucose-6-phosphate 1-dehydrogenase                                                                                                                   | Ga0456434_10_232743_234230        | 84                                | Y                         | Y                  | Y                     | Y                              | Y                           |

## References

1. Gordon, R.E.; Smith, N.R.; Pang, C.H.-N.; Haynes, W.C. *The genus Bacillus*; Agricultural Research Service, U.S. Dept. of Agriculture : For sale by Supt. of Docs., U.S. G.P.O.: Washington, D.C., 1973; pp. vii, 283 p.
2. Atlas, R.M., ed. *Handbook of Microbiological Media*; Atlas, R.M., Ed.; CRC Press: 2010.
3. Marmont, L.S.; Whitfield, G.B.; Rich, J.D.; Yip, P.; Giesbrecht, L.B.; Stremick, C.A.; Whitney, J.C.; Parsek, M.R.; Harrison, J.J.; Howell, P.L. PelA and PelB proteins form a modification and secretion complex essential for Pel polysaccharide-dependent biofilm formation in *Pseudomonas aeruginosa*. *J Biol Chem* **2017**, *292*, 19411-19422, doi:10.1074/jbc.M117.812842.
4. Núñez-Montero, K.; Quezada-Solís, D.; Khalil, Z.G.; Capon, R.J.; Andreote, F.D.; Barrientos, L. Genomic and Metabolomic Analysis of Antarctic Bacteria Revealed Culture and Elicitation Conditions for the Production of Antimicrobial Compounds. *Biomolecules* **2020**, *10*, 673, doi:10.3390/biom10050673.
5. Thurnheer, T.; Cook, A.M.; Leisinger, T. Co-culture of defined bacteria to degrade seven sulfonated aromatic compounds: efficiency, rates and phenotypic variations. *Appl Microbiol Biotechnol* **1988**, *29*, 605-609.
6. Pfennig, N. *Rhodocyclus purpureus* gen. nov. and sp. nov., a Ring-Shaped, Vitamin B<sub>12</sub>-Requiring Member of the Family Rhodospirillaceae. *Int J Sys Evol Microbiol* **1978**, *28*, 283-288, doi:10.1099/00207713-28-2-283.
7. Alvarez-Perez, S.; de Vega, C.; Vanoirbeek, K.; Tsuji, K.; Jacquemyn, H.; Fukami, T.; Michiels, C.; Lievens, B. Phylogenomic analysis of the genus *Rosenbergiella* and description of *Rosenbergiella gaditana* sp. nov., *Rosenbergiella metrosideri* sp. nov., *Rosenbergiella epipactidis* subsp. *epipactidis* subsp. nov., *Rosenbergiella epipactidis* subsp. *californiensis* subsp. nov., *Rosenbergiella epipactidis* subsp. *japonicus* subsp. nov., *Rosenbergiella nectarea* subsp. *nectarea* subsp. nov. and *Rosenbergiella nectarea* subsp. *apis* subsp. nov., isolated from floral nectar and insects. *Int J Syst Evol Microbiol* **2023**, *73*, doi:10.1099/ijsem.0.005777.
8. Jain, C.; Rodriguez-R, L.M.; Phillippy, A.M.; Konstantinidis, K.T.; Aluru, S. High throughput ANI analysis of 90K prokaryotic genomes reveals clear species boundaries. *Nat Commun* **2018**, *9*, 5114-5114, doi:10.1038/s41467-018-07641-9.
9. Sulavik, M.C.; Houseweart, C.; Cramer, C.; Jiwani, N.; Murgolo, N.; Greene, J.; DiDomenico, B.; Shaw, K.J.; Miller, G.H.; Hare, R.; et al. Antibiotic susceptibility profiles of *Escherichia coli* strains lacking multidrug efflux pump genes. *Antimicrob Agents Chemother* **2001**, *45*, 1126-1136, doi:10.1128/aac.45.4.1126-1136.2001.
10. Tauch, A.; Kirchner, O.; Löffler, B.; Götter, S.; Pühler, A.; Kalinowski, J. Efficient Electrotransformation of *Corynebacterium diphtheriae* with a Mini-Replicon Derived from the *Corynebacterium glutamicum* Plasmid pGA1. *Curr Microbiol* **2002**, *45*, 362-367, doi:10.1007/s00284-002-3728-3.
11. Hooper, D.C.; Wolfson, J.S.; McHugh, G.L.; Swartz, M.D.; Tung, C.; Swartz, M.N. Elimination of plasmid pMG110 from *Escherichia coli* by novobiocin and other inhibitors of DNA gyrase. *Antimicrob Agents Chemother* **1984**, *25*, 586-590, doi:10.1128/AAC.25.5.586.
12. Halpern, M.; Fridman, S.; Atamna-Ismaeel, N.; Izhaki, I. *Rosenbergiella nectarea* gen. nov., sp. nov., in the family *Enterobacteriaceae*, isolated from floral nectar. *Int J Syst Evol Microbiol* **2013**, *63*, 4259-4265, doi:10.1099/ijms.0.052217-0.
13. Lenaerts, M.; Alvarez-Pérez, S.; de Vega, C.; Van Assche, A.; Johnson, S.D.; Willems, K.A.; Herrera, C.M.; Jacquemyn, H.; Lievens, B. *Rosenbergiella australoborealis* sp. nov., *Rosenbergiella collisarenosi* sp. nov. and *Rosenbergiella epipactidis* sp. nov.,

- three novel bacterial species isolated from floral nectar. *Syst Appl Microbiol* **2014**, *37*, 402-411, doi:10.1016/j.syapm.2014.03.002.
14. Blin, K.; Shaw, S.; Steinke, K.; Villebro, R.; Ziemert, N.; Lee, S.Y.; Medema, M.H.; Weber, T. antiSMASH 5.0: updates to the secondary metabolite genome mining pipeline. *Nucleic Acids Res* **2019**, *47*, W81-W87, doi:10.1093/nar/gkz310.
  15. Blin, K.; Shaw, S.; Kloosterman, A.M.; Charlop-Powers, Z.; van Wezel, G.P.; Medema, Marnix H.; Weber, T. antiSMASH 6.0: improving cluster detection and comparison capabilities. *Nucleic Acids Res* **2021**, *49*, W29-W35, doi:10.1093/nar/gkab335.
  16. Barona-Gómez, F.; Wong, U.; Giannakopoulos, A.E.; Derrick, P.J.; Challis, G.L. Identification of a cluster of genes that directs desferrioxamine biosynthesis in *Streptomyces coelicolor* M145. *J Am Chem Soc* **2004**, *126*, 16282-16283, doi:10.1021/ja045774k.
  17. Raymond, K.N.; Dertz, E.A.; Kim, S.S. Enterobactin: an archetype for microbial iron transport. *Proc Natl Acad Sci U S A* **2003**, *100*, 3584-3588, doi:10.1073/pnas.0630018100.
  18. Salomone-Stagni, M.; Bartho, J.D.; Polsinelli, I.; Bellini, D.; Walsh, M.A.; Demitri, N.; Benini, S. A complete structural characterization of the desferrioxamine E biosynthetic pathway from the fire blight pathogen *Erwinia amylovora*. *J Struct Biol* **2018**, *202*, 236-249, doi:10.1016/j.jsb.2018.02.002.
  19. Smits, T.H.; Duffy, B. Genomics of iron acquisition in the plant pathogen *Erwinia amylovora*: insights in the biosynthetic pathway of the siderophore desferrioxamine E. *Arch Microbiol* **2011**, *193*, 693-699, doi:10.1007/s00203-011-0739-0.
  20. Choi, O.; Kang, B.; Lee, Y.; Lee, Y.; Kim, J.-H. *Pantoea ananatis* carotenoid production confers toxoflavin tolerance and is regulated by Hfq - controlled quorum sensing. *MicrobiologyOpen* **2021**, *10*, doi:10.1002/mbo3.1143.
  21. Misawa, N.; Satomi, Y.; Kondo, K.; Yokoyama, A.; Kajiwara, S.; Saito, T.; Ohtani, T.; Miki, W. Structure and functional analysis of a marine bacterial carotenoid biosynthesis gene cluster and astaxanthin biosynthetic pathway proposed at the gene level. *J Bacteriol* **1995**, *177*, 6575-6584, doi:10.1128/jb.177.22.6575-6584.1995.
  22. Rodionov, D.A.; Vitreschak, A.G.; Mironov, A.A.; Gelfand, M.S. Comparative Genomics of Thiamin Biosynthesis in Prokaryotes: New Genes and Regulatory Mechanisms *J Biol Chem* **2002**, *277*, 48949-48959, doi:10.1074/jbc.M208965200.
  23. Du, Q.; Wang, H.; Xie, J. Thiamin (vitamin B<sub>1</sub>) biosynthesis and regulation: a rich source of antimicrobial drug targets? *Int J Biol Sci* **2011**, *7*, 41-52, doi:10.7150/ijbs.7.41.
  24. Webb, E.; Claas, K.; Downs, D.M. Characterization of thil, a new gene involved in thiazole biosynthesis in *Salmonella typhimurium*. *J Bacteriol* **1997**, *179*, 4399-4402, doi:10.1128/jb.179.13.4399-4402.1997.
  25. García-Angulo, V.A. Overlapping riboflavin supply pathways in bacteria. *Crit Rev Microbiol* **2017**, *43*, 196-209, doi:10.1080/1040841X.2016.1192578.
  26. Afzal, M.; Kuipers, O.P.; Shafeeq, S. Niacin-mediated Gene Expression and Role of NiaR as a Transcriptional Repressor of niaX, nadC, and pneC in *Streptococcus pneumoniae*. *Front Cell Infect Microbiol* **2017**, *7*, 70-70, doi:10.3389/fcimb.2017.00070.
  27. Leonardi, R.; Jackowski, S. Biosynthesis of Pantothenic Acid and Coenzyme A. *EcoSal Plus* **2007**, *2*, doi:10.1128/ecosalplus.3.6.3.4.
  28. Zheng, R.; Blanchard, J.S. Kinetic and mechanistic analysis of the *E. coli* panE-encoded ketopantoate reductase. *Biochemistry* **2000**, *39*, 3708-3717, doi:10.1021/bi992676g.
  29. Blattner, F.R.; Plunkett, G., 3rd; Bloch, C.A.; Perna, N.T.; Burland, V.; Riley, M.; Collado-Vides, J.; Glasner, J.D.; Rode, C.K.; Mayhew, G.F.; et al. The complete genome sequence of *Escherichia coli* K-12. *Science* **1997**, *277*, 1453-1462, doi:10.1126/science.277.5331.1453.

30. Laber, B.; Maurer, W.; Scharf, S.; Stepusin, K.; Schmidt, F.S. Vitamin B<sub>6</sub> biosynthesis: formation of pyridoxine 5'-phosphate from 4-(phosphohydroxy)-L-threonine and 1-deoxy-D-xylulose-5-phosphate by PdxA and PdxJ protein. *FEBS Lett* **1999**, *449*, 45-48, doi:10.1016/s0014-5793(99)00393-2.
31. Ploux, O.; Soularue, P.; Marquet, A.; Gloeckler, R.; Lemoine, Y. Investigation of the first step of biotin biosynthesis in *Bacillus sphaericus*. Purification and characterization of the pimeloyl-CoA synthase, and uptake of pimelate. *Biochem J* **1992**, *287* ( Pt 3), 685-690, doi:10.1042/bj2870685.
32. Binieda, A.; Fuhrmann, M.; Lehner, B.; Rey-Berthod, C.; Frutiger-Hughes, S.; Hughes, G.; Shaw, N.M. Purification, characterization, DNA sequence and cloning of a pimeloyl-CoA synthetase from *Pseudomonas mendocina* 35. *Biochem J* **1999**, *340* ( Pt 3), 793-801.
33. Tauch, A.; Schneider, J.; Szczepanowski, R.; Tilker, A.; Viehoveer, P.; Gartemann, K.H.; Arnold, W.; Blom, J.; Brinkrolf, K.; Brune, I.; et al. Ultrafast pyrosequencing of *Corynebacterium kroppenstedtii* DSM44385 revealed insights into the physiology of a lipophilic corynebacterium that lacks mycolic acids. *J Biotechnol* **2008**, *136*, 22-30, doi:10.1016/j.jbiotec.2008.03.004.
34. Webster, S.P.; Alexeev, D.; Campopiano, D.J.; Watt, R.M.; Alexeeva, M.; Sawyer, L.; Baxter, R.L. Mechanism of 8-amino-7-oxononanoate synthase: spectroscopic, kinetic, and crystallographic studies. *Biochemistry* **2000**, *39*, 516-528, doi:10.1021/bi991620j.
35. Lin, S.; Hanson, R.E.; Cronan, J.E. Biotin synthesis begins by hijacking the fatty acid synthetic pathway. *Nat Chem Biol* **2010**, *6*, 682-688, doi:10.1038/nchembio.420.
36. Sanyal, I.; Cohen, G.; Flint, D.H. Biotin synthase: purification, characterization as a [2Fe-2S]cluster protein, and in vitro activity of the *Escherichia coli* bioB gene product. *Biochemistry* **1994**, *33*, 3625-3631, doi:10.1021/bi00178a020.
37. Stoner, G.L.; Eisenberg, M.A. Purification and properties of 7, 8-diaminopelargonic acid aminotransferase. *J Biol Chem* **1975**, *250*, 4029-4036.
38. Cole, S.T.; Brosch, R.; Parkhill, J.; Garnier, T.; Churcher, C.; Harris, D.; Gordon, S.V.; Eiglmeier, K.; Gas, S.; Barry, C.E., 3rd; et al. Deciphering the biology of *Mycobacterium tuberculosis* from the complete genome sequence. *Nature* **1998**, *393*, 537-544, doi:10.1038/31159.
39. Otsuka, A.J.; Buoncristiani, M.R.; Howard, P.K.; Flamm, J.; Johnson, C.; Yamamoto, R.; Uchida, K.; Cook, C.; Ruppert, J.; Matsuzaki, J. The *Escherichia coli* biotin biosynthetic enzyme sequences predicted from the nucleotide sequence of the bio operon. *J Biol Chem* **1988**, *263*, 19577-19585.
40. Sybesma, W.; Starrenburg, M.; Kleerebezem, M.; Mierau, I.; de Vos, W.M.; Hugenholtz, J. Increased production of folate by metabolic engineering of *Lactococcus lactis*. *Appl Environ Microbiol* **2003**, *69*, 3069-3076, doi:10.1128/AEM.69.6.3069-3076.2003.
41. Rebelo, J.; Auerbach, G.; Bader, G.; Bracher, A.; Nar, H.; Hösl, C.; Schramek, N.; Kaiser, J.; Bacher, A.; Huber, R.; et al. Biosynthesis of pteridines. Reaction mechanism of GTP cyclohydrolase I. *J Mol Biol* **2003**, *326*, 503-516, doi:10.1016/s0022-2836(02)01303-7.
42. Swedberg, G.; Castensson, S.; Sköld, O. Characterization of mutationally altered dihydropterate synthase and its ability to form a sulfonamide-containing dihydrofolate analog. *J Bacteriol* **1979**, *137*, 129-136, doi:10.1128/jb.137.1.129-136.1979.
43. Bognar, A.L.; Osborne, C.; Shane, B.; Singer, S.C.; Ferone, R. Polyglutamate synthetase-dihydrofolate synthetase. Cloning and high expression of the *Escherichia coli* folC gene and purification and properties of the gene product. *J Biol Chem* **1985**, *260*, 5625-5630.
44. Huang, M.; Gibson, F. Biosynthesis of 4-aminobenzoate in *Escherichia coli*. *J Bacteriol* **1970**, *102*, 767-773, doi:10.1128/jb.102.3.767-773.1970.

45. Green, J.M.; Nichols, B.P. p-Aminobenzoate biosynthesis in *Escherichia coli*. Purification of aminodeoxychorismate lyase and cloning of pabC. *J Biol Chem* **1991**, *266*, 12971-12975.
46. Fang, H.; Kang, J.; Zhang, D. Microbial production of vitamin B12: a review and future perspectives. *Microbial Cell Factories* **2017**, *16*, 15, doi:10.1186/s12934-017-0631-y.
47. Cadieux, N.; Bradbeer, C.; Reeger-Schneider, E.; Köster, W.; Mohanty, A.K.; Wiener, M.C.; Kadner, R.J. Identification of the periplasmic cobalamin-binding protein BtuF of *Escherichia coli*. *J Bacteriol* **2002**, *184*, 706-717, doi:10.1128/jb.184.3.706-717.2002.
48. Xu, K.; Delling, J.; Elliott, T. The genes required for heme synthesis in *Salmonella typhimurium* include those encoding alternative functions for aerobic and anaerobic coproporphyrinogen oxidation. *J Bacteriol* **1992**, *174*, 3953-3963, doi:10.1128/jb.174.12.3953-3963.1992.
49. Raux, E.; Lanois, A.; Rambach, A.; Warren, M.J.; Thermes, C. Cobalamin (vitamin B12) biosynthesis: functional characterization of the *Bacillus megaterium* cbi genes required to convert uroporphyrinogen III into cobyrinic acid a,c-diamide. *Biochem J* **1998**, *335* (Pt 1), 167-173, doi:10.1042/bj3350167.
50. Raux, E.; Lanois, A.; Levillayer, F.; Warren, M.J.; Brody, E.; Rambach, A.; Thermes, C. *Salmonella typhimurium* cobalamin (vitamin B<sub>12</sub>) biosynthetic genes: functional studies in *S. typhimurium* and *Escherichia coli*. *J Bacteriol* **1996**, *178*, 753-767, doi:10.1128/jb.178.3.753-767.1996.
51. Roth, J.R.; Lawrence, J.G.; Rubenfield, M.; Kieffer-Higgins, S.; Church, G.M. Characterization of the cobalamin (vitamin B<sub>12</sub>) biosynthetic genes of *Salmonella typhimurium*. *J Bacteriol* **1993**, *175*, 3303-3316, doi:10.1128/jb.175.11.3303-3316.1993.
52. Chen, P.; Ailion, M.; Weyand, N.; Roth, J. The end of the cob operon: evidence that the last gene (cobT) catalyzes synthesis of the lower ligand of vitamin B12, dimethylbenzimidazole. *J Bacteriol* **1995**, *177*, 1461-1469, doi:10.1128/jb.177.6.1461-1469.1995.
53. Lawrence, J.G.; Roth, J.R. Evolution of coenzyme B<sub>12</sub> synthesis among enteric bacteria: evidence for loss and reacquisition of a multigene complex. *Genetics* **1996**, *142*, 11-24, doi:10.1093/genetics/142.1.11.
54. The UniProt, C. UniProt: the universal protein knowledgebase in 2021. *Nucleic Acids Res* **2021**, *49*, D480-D489, doi:10.1093/nar/gkaa1100.
55. Driscoll, J.R.; Taber, H.W. Sequence organization and regulation of the *Bacillus subtilis* menBE operon. *J Bacteriol* **1992**, *174*, 5063-5071, doi:10.1128/jb.174.15.5063-5071.1992.
56. Bentley, R.; Meganathan, R. Biosynthesis of vitamin K (menaquinone) in bacteria. *Microbiol Rev* **1982**, *46*, 241-280, doi:10.1128/mr.46.3.241-280.1982.
57. Herrmann, K.M.; Weaver, L.M. The Shikimate Pathway. *Annu Rev Plant Physiol Plant Mol Biol* **1999**, *50*, 473-503, doi:10.1146/annurev.arplant.50.1.473.
58. Liu, J.; Bai, Y.; Fan, T.P.; Zheng, X.; Cai, Y. Unveiling the Multipath Biosynthesis Mechanism of 2-Phenylethanol in *Proteus mirabilis*. *J Agric Food Chem* **2020**, *68*, 7684-7690, doi:10.1021/acs.jafc.0c02918.
59. Ravasio, D.; Wendland, J.; Walther, A. Major contribution of the Ehrlich pathway for 2-phenylethanol/rose flavor production in *Ashbya gossypii*. *FEMS Yeast Res* **2014**, *14*, 833-844, doi:10.1111/1567-1364.12172.
60. Derrick, S.; Large, P.J. Activities of the enzymes of the Ehrlich pathway and formation of branched-chain alcohols in *Saccharomyces cerevisiae* and *Candida utilis* grown in continuous culture on valine or ammonium as sole nitrogen source. *Microbiology* **1993**, *139*, 2783-2792, doi:10.1099/00221287-139-11-2783.
61. Kim, B.; Cho, B.R.; Hahn, J.S. Metabolic engineering of *Saccharomyces cerevisiae* for the production of 2-phenylethanol via Ehrlich pathway. *Biotechnol Bioeng* **2014**, *111*, 115-124, doi:10.1002/bit.24993.

62. Reygaert, W.C. An overview of the antimicrobial resistance mechanisms of bacteria. *AIMS Microbiol* **2018**, *4*, 482-501, doi:10.3934/microbiol.2018.3.482.
63. Baranova, N.; Nikaido, H. The baeSR two-component regulatory system activates transcription of the yegMNOB (mdtABCD) transporter gene cluster in *Escherichia coli* and increases its resistance to novobiocin and deoxycholate. *J Bacteriol* **2002**, *184*, 4168-4176, doi:10.1128/jb.184.15.4168-4176.2002.
64. Nagakubo, S.; Nishino, K.; Hirata, T.; Yamaguchi, A. The putative response regulator BaeR stimulates multidrug resistance of *Escherichia coli* via a novel multidrug exporter system, MdtABC. *J Bacteriol* **2002**, *184*, 4161-4167, doi:10.1128/jb.184.15.4161-4167.2002.
65. Hobbs, E.C.; Yin, X.; Paul, B.J.; Astarita, J.L.; Storz, G. Conserved small protein associates with the multidrug efflux pump AcrB and differentially affects antibiotic resistance. *Proc Natl Acad Sci U S A* **2012**, *109*, 16696-16701, doi:10.1073/pnas.1210093109.
66. Guan, N.; Liu, L. Microbial response to acid stress: mechanisms and applications. *Appl Microbiol Biotechnol* **2020**, *104*, 51-65, doi:10.1007/s00253-019-10226-1.
67. Olkhova, E.; Hunte, C.; Screpanti, E.; Padan, E.; Michel, H. Multiconformation continuum electrostatics analysis of the NhaA Na<sup>+</sup>/H<sup>+</sup> antiporter of *Escherichia coli* with functional implications. *Proc Natl Acad Sci U S A* **2006**, *103*, 2629-2634, doi:10.1073/pnas.0510914103.
68. Fujisawa, M.; Ito, M.; Krulwich, T.A. Three two-component transporters with channel-like properties have monovalent cation/proton antiport activity. *Proc Natl Acad Sci U S A* **2007**, *104*, 13289-13294, doi:10.1073/pnas.0703709104.
69. Ferguson, G.P.; Nikolaev, Y.; McLaggan, D.; Maclean, M.; Booth, I.R. Survival during exposure to the electrophilic reagent *N*-ethylmaleimide in *Escherichia coli*: role of KefB and KefC potassium channels. *J Bacteriol* **1997**, *179*, 1007-1012, doi:10.1128/jb.179.4.1007-1012.1997.
70. Sohlenkamp, C.; Geiger, O. Bacterial membrane lipids: diversity in structures and pathways. *FEMS Microbiol Rev* **2016**, *40*, 133-159, doi:10.1093/femsre/fuv008.
71. Gowrishankar, J. Nucleotide sequence of the osmoregulatory proU operon of *Escherichia coli*. *J Bacteriol* **1989**, *171*, 1923-1931, doi:10.1128/jb.171.4.1923-1931.1989.
72. Haardt, M.; Kempf, B.; Faatz, E.; Bremer, E. The osmoprotectant proline betaine is a major substrate for the binding-protein-dependent transport system ProU of *Escherichia coli* K-12. *Mol Gen Genet* **1995**, *246*, 783-786, doi:10.1007/bf00290728.
73. Farr, S.B.; Kogoma, T. Oxidative stress responses in *Escherichia coli* and *Salmonella typhimurium*. *Microbiol Rev* **1991**, *55*, 561-585, doi:10.1128/mr.55.4.561-585.1991.
74. Takeda, Y.; Avila, H. Structure and gene expression of the *E. coli* Mn-superoxide dismutase gene. *Nucleic Acids Res* **1986**, *14*, 4577-4589, doi:10.1093/nar/14.11.4577.
75. Saporito, S.M.; Cunningham, R.P. Nucleotide sequence of the nfo gene of *Escherichia coli* K-12. *J Bacteriol* **1988**, *170*, 5141-5145, doi:10.1128/jb.170.11.5141-5145.1988.
76. Laviad-Shitrit, S.; Izhaki, I.; Whitman, W.B.; Shapiro, N.; Woyke, T.; Kyrpides, N.C.; Halpern, M. Draft genome of *Rosenbergiella nectarea* strain 8N4(T) provides insights into the potential role of this species in its plant host. *PeerJ* **2020**, *8*, e8822, doi:10.7717/peerj.8822.
77. Bagg, A.; Neilands, J.B. Ferric uptake regulation protein acts as a repressor, employing iron (II) as a cofactor to bind the operator of an iron transport operon in *Escherichia coli*. *Biochemistry* **1987**, *26*, 5471-5477, doi:10.1021/bi00391a039.
78. Seaver, L.C.; Imlay, J.A. Alkyl hydroperoxide reductase is the primary scavenger of endogenous hydrogen peroxide in *Escherichia coli*. *J Bacteriol* **2001**, *183*, 7173-7181, doi:10.1128/jb.183.24.7173-7181.2001.
79. Almirón, M.; Link, A.J.; Furlong, D.; Kolter, R. A novel DNA-binding protein with regulatory and protective roles in starved *Escherichia coli*. *Genes Dev* **1992**, *6*, 2646-2654, doi:10.1101/gad.6.12b.2646.



80. Nair, S.; Finkel, S.E. Dps protects cells against multiple stresses during stationary phase. *J Bacteriol* **2004**, *186*, 4192-4198, doi:10.1128/jb.186.13.4192-4198.2004.
